# Supplementary material for: Synthesis of glycerolipids containing simple linear acyl chains or aromatic rings and evaluation of their Mincle signaling activity
Source: Royal Society of Chemistry journal article supplement (doi:10.1039/c8cc07322h), 2018-12-10

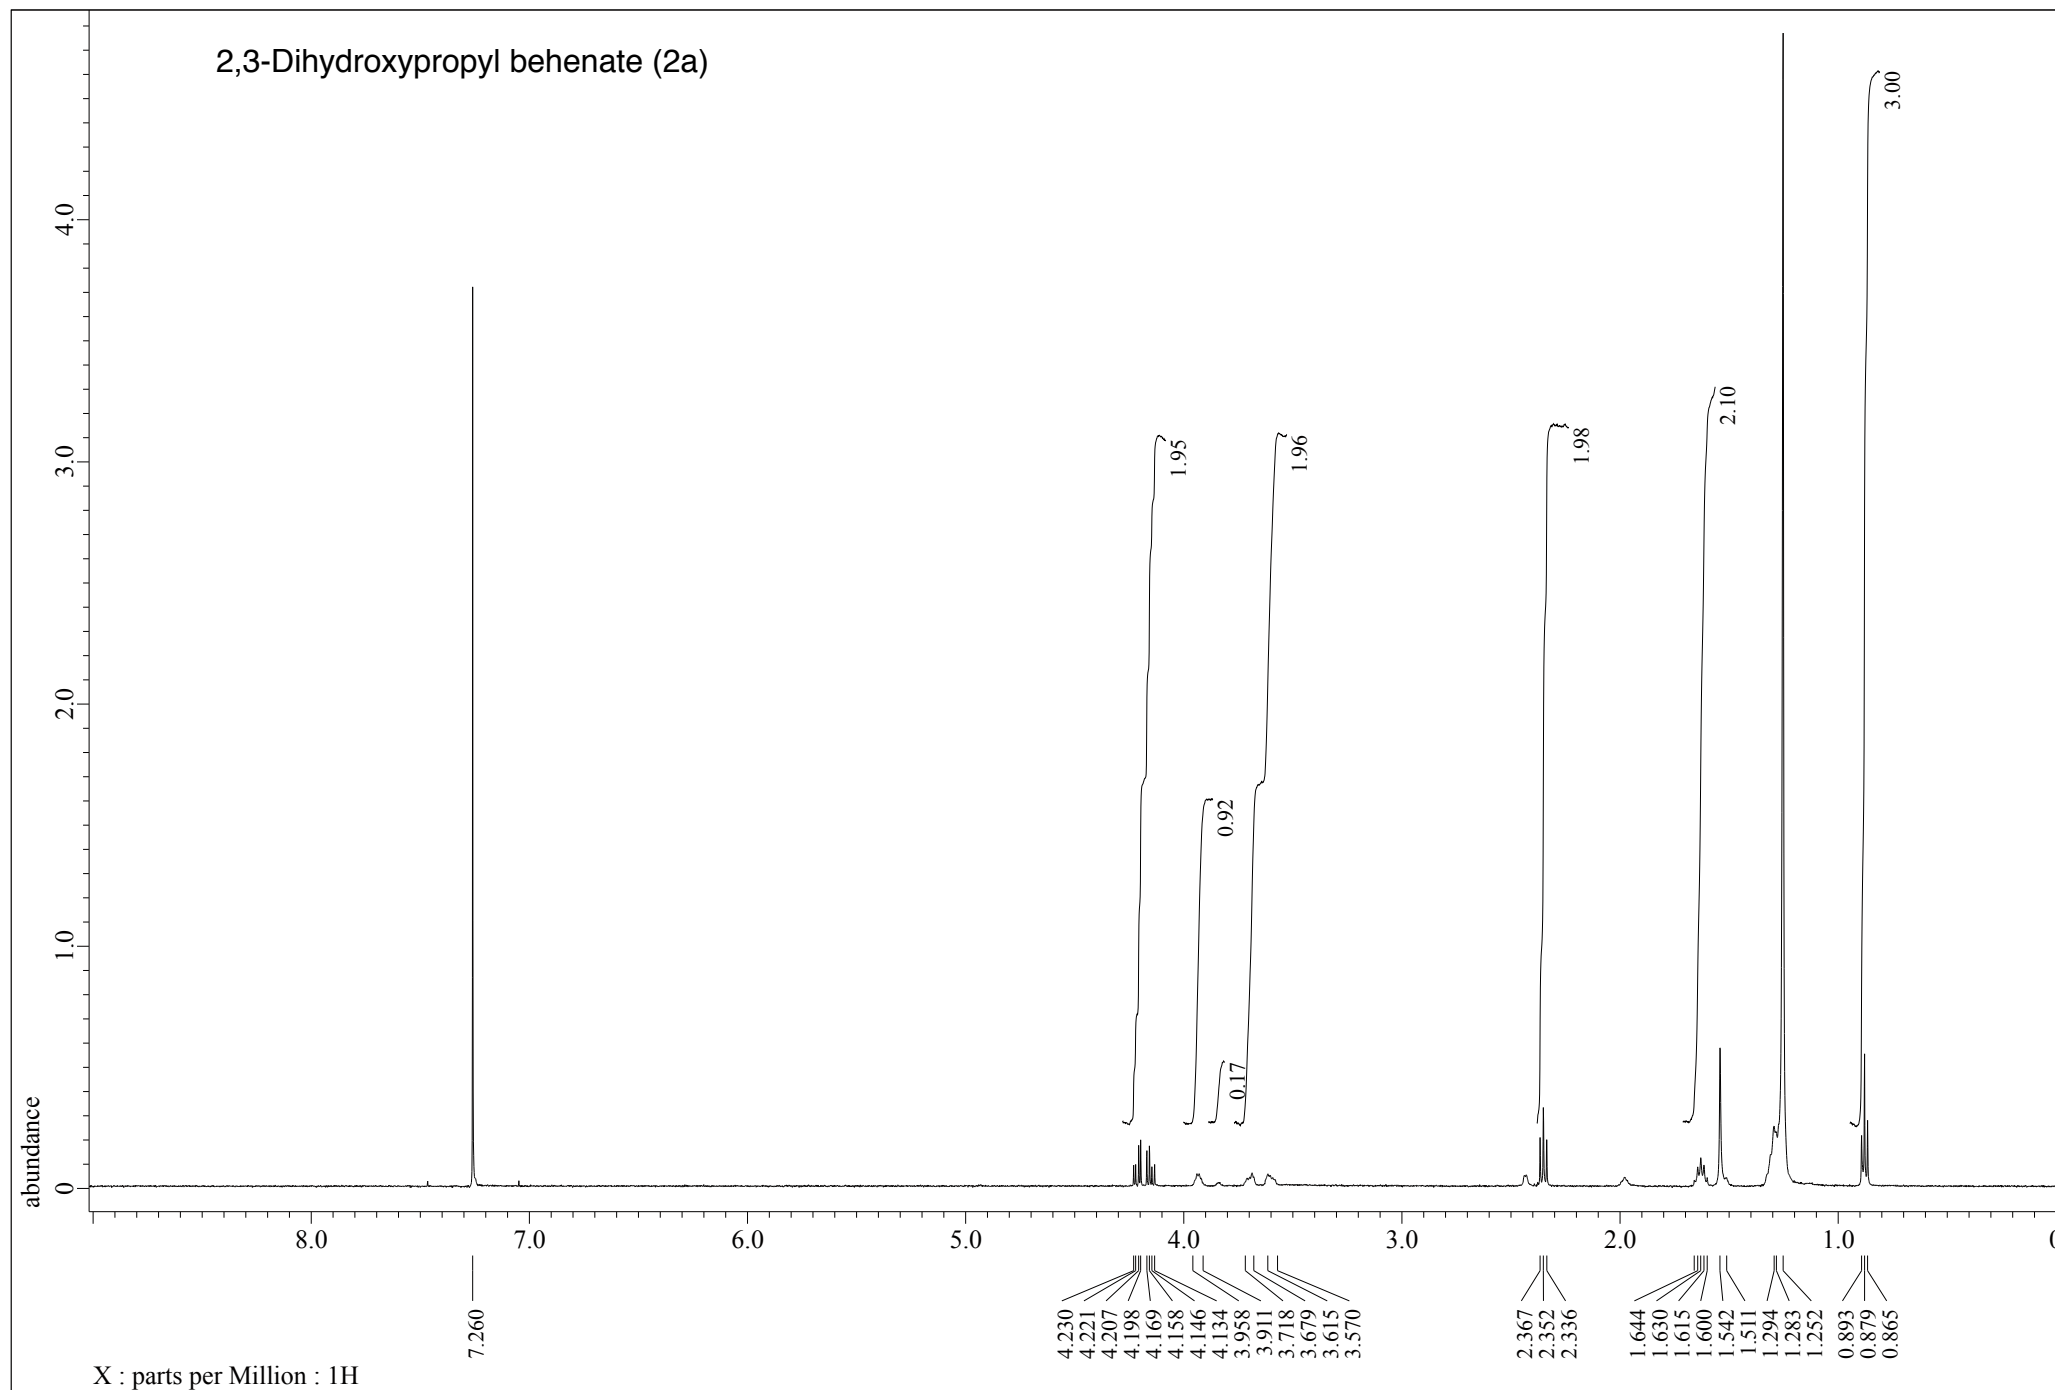

2,3-Dihydroxypropyl behenate (2a)

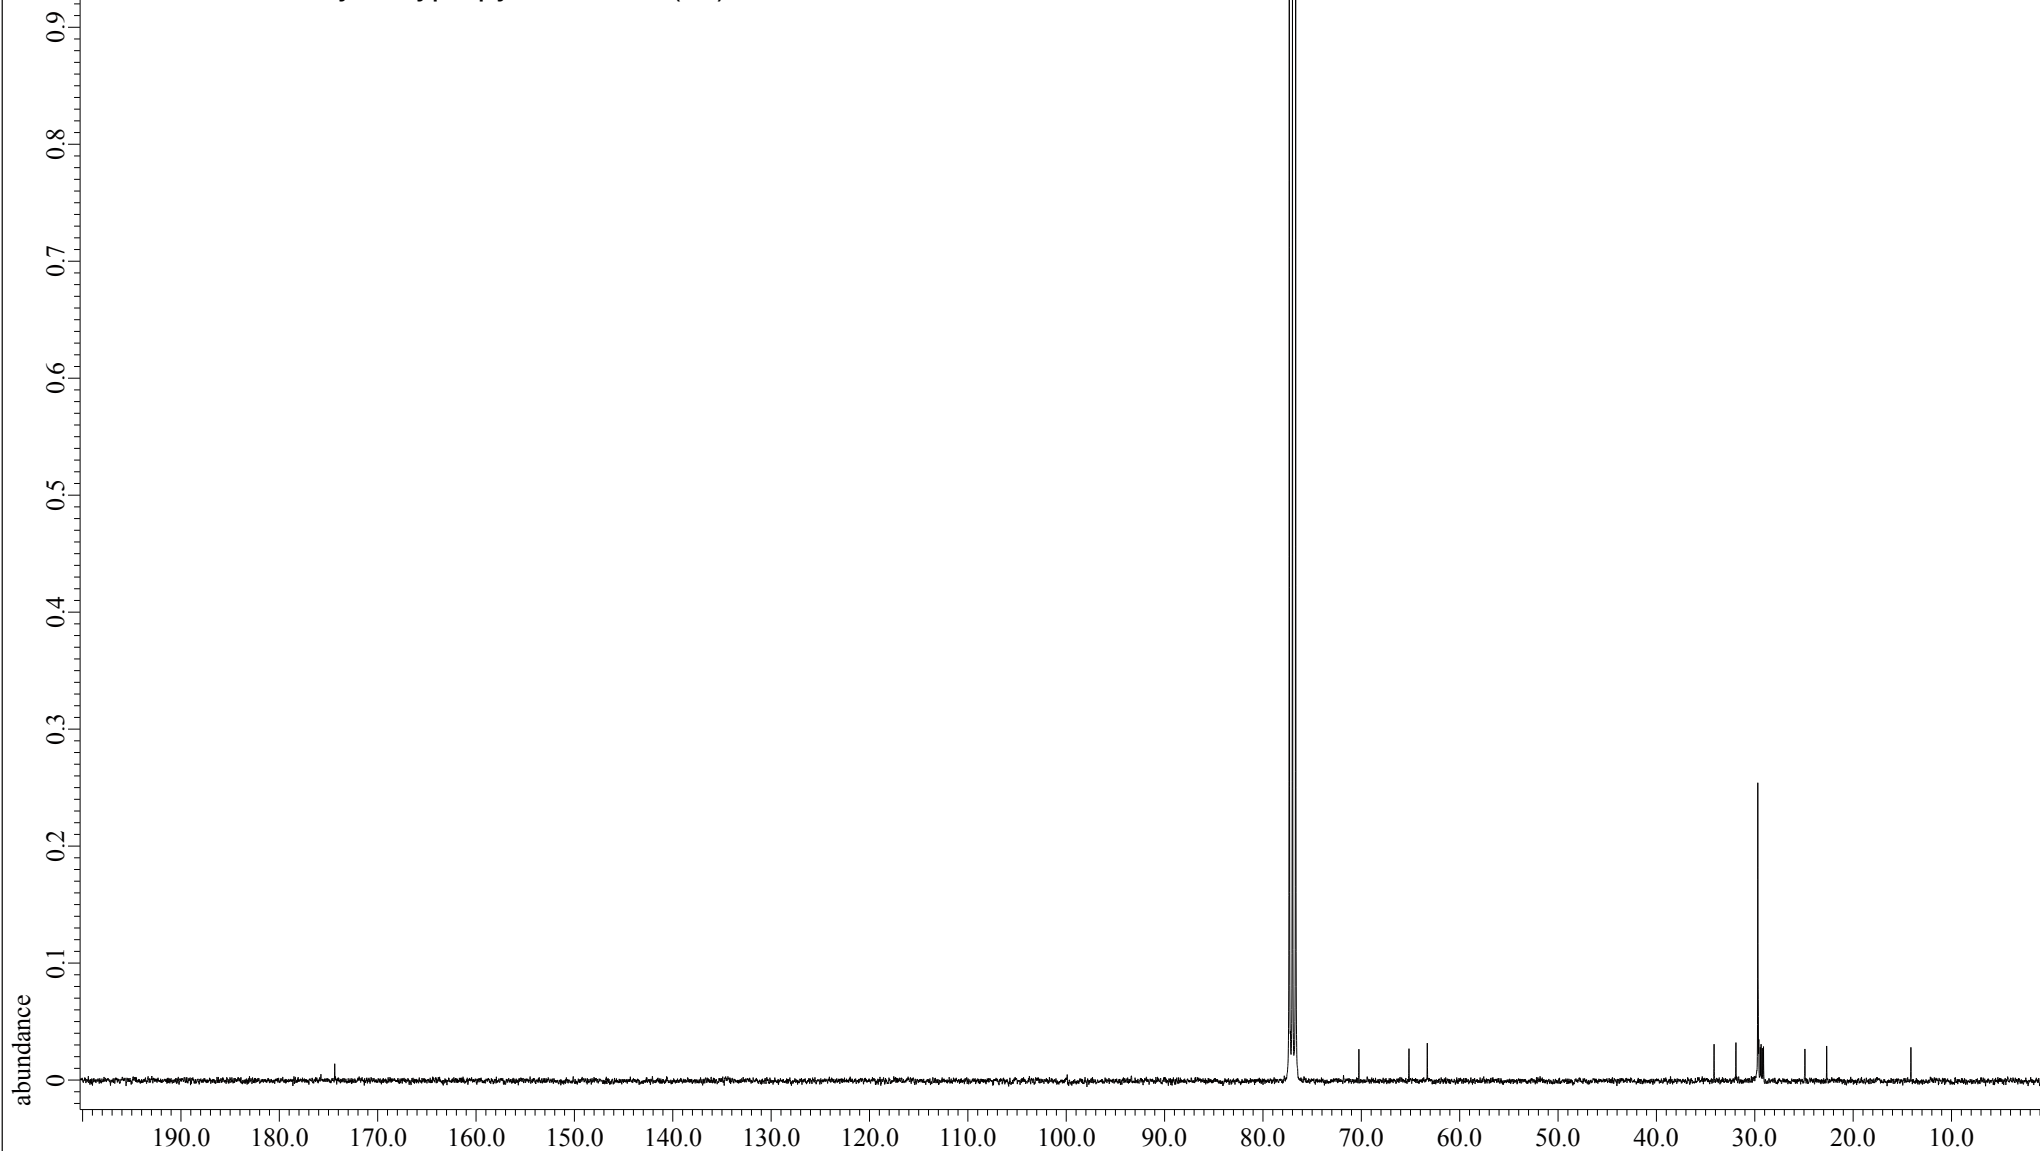

X : parts per Million : 13C

2,3-Dihydroxypropyl tetracosanoate (2b)

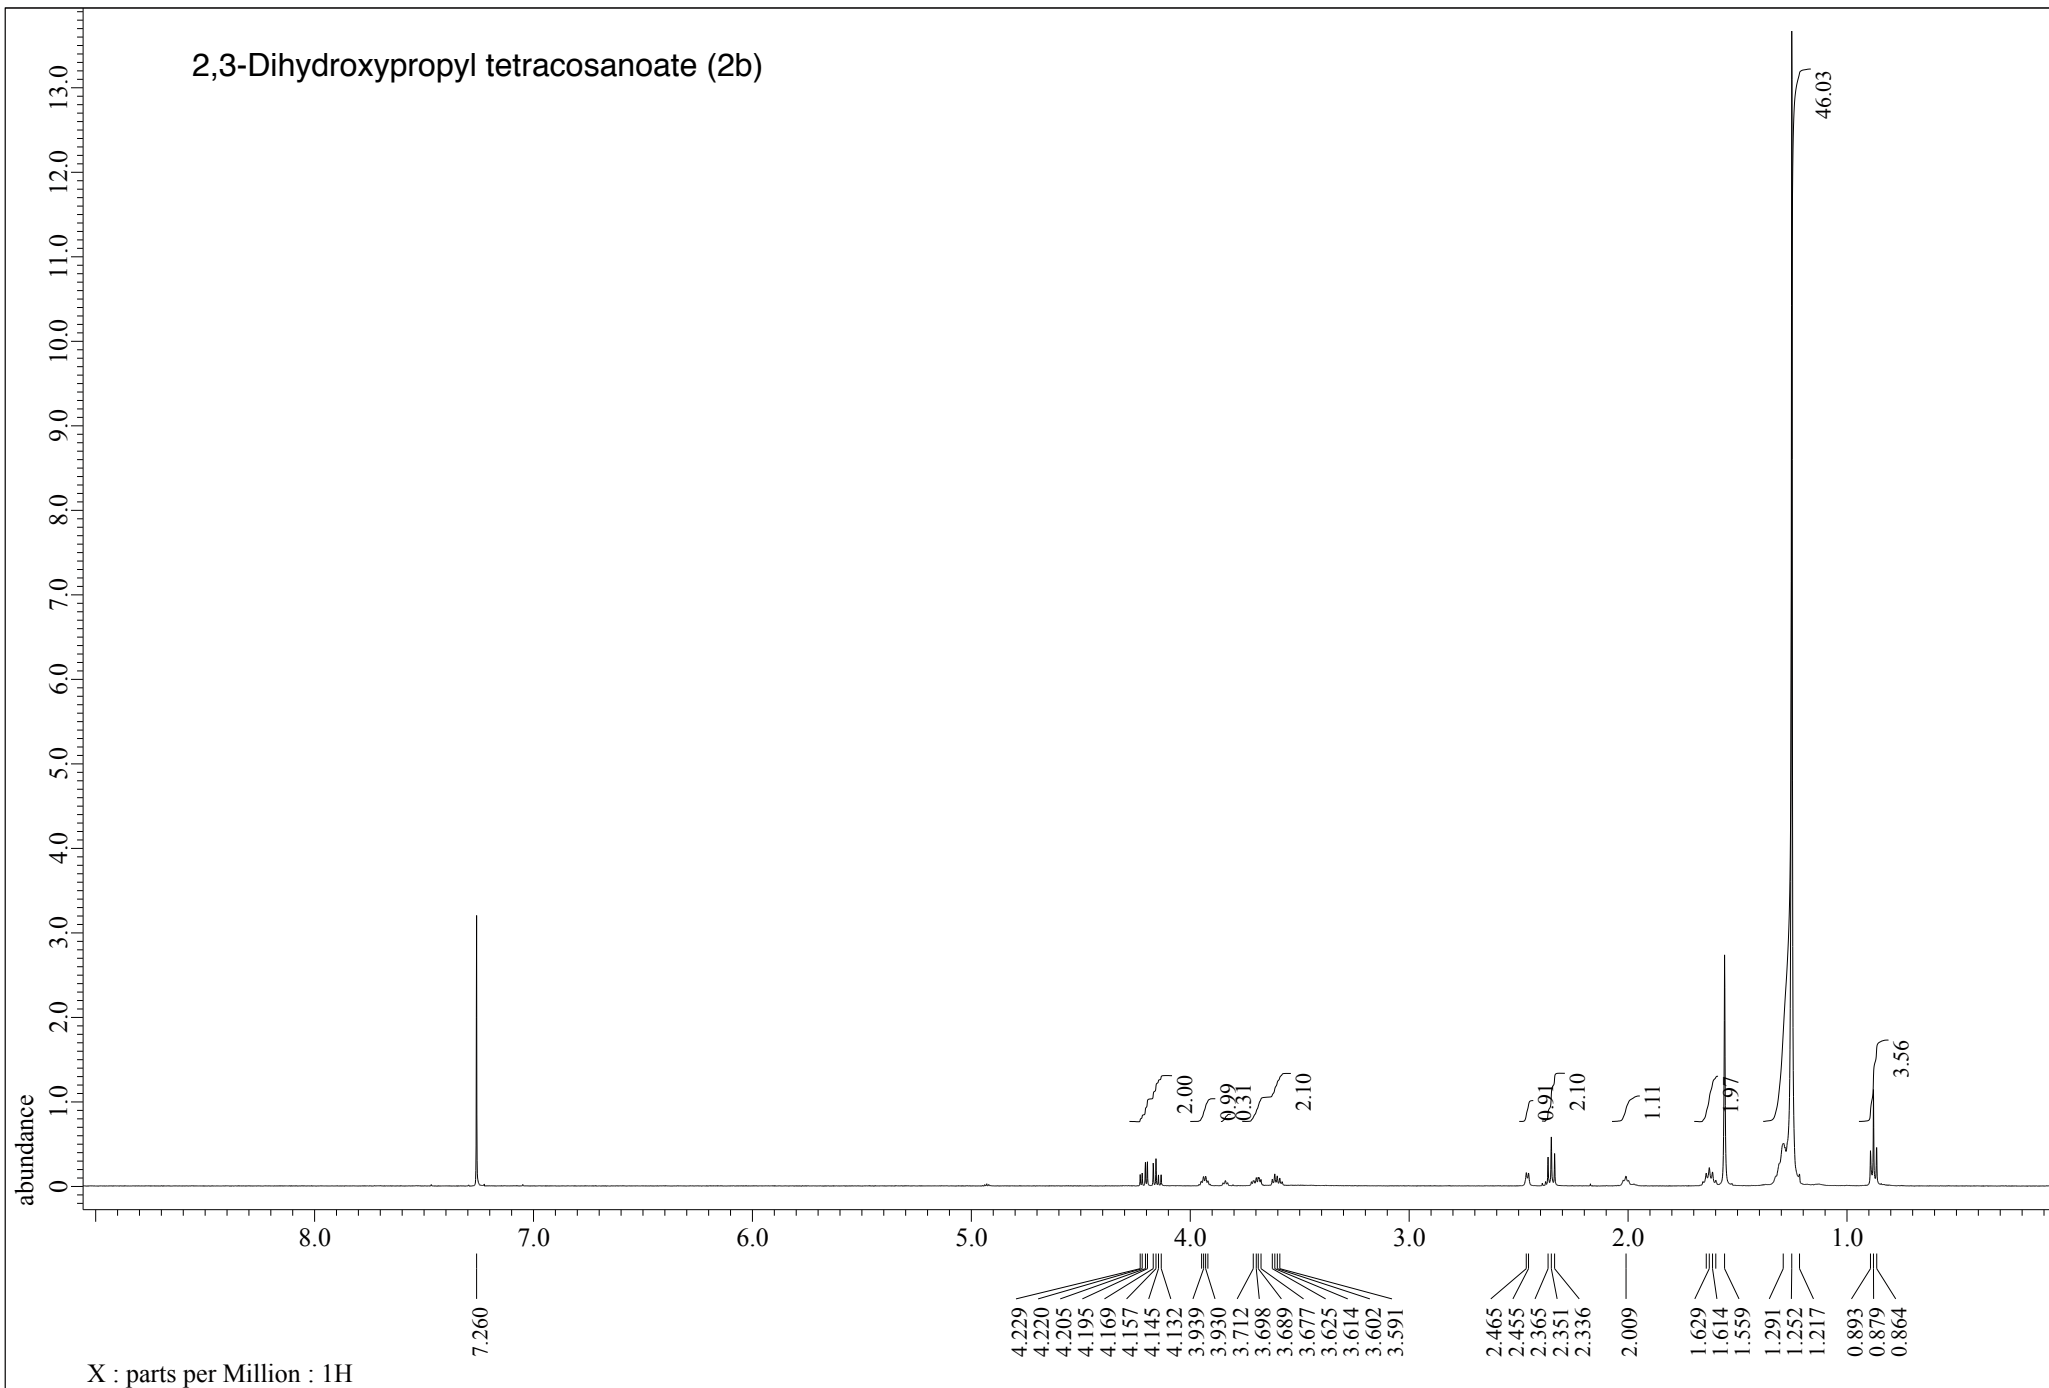

2,3-Dihydroxypropyl tetracosanoate (2b)

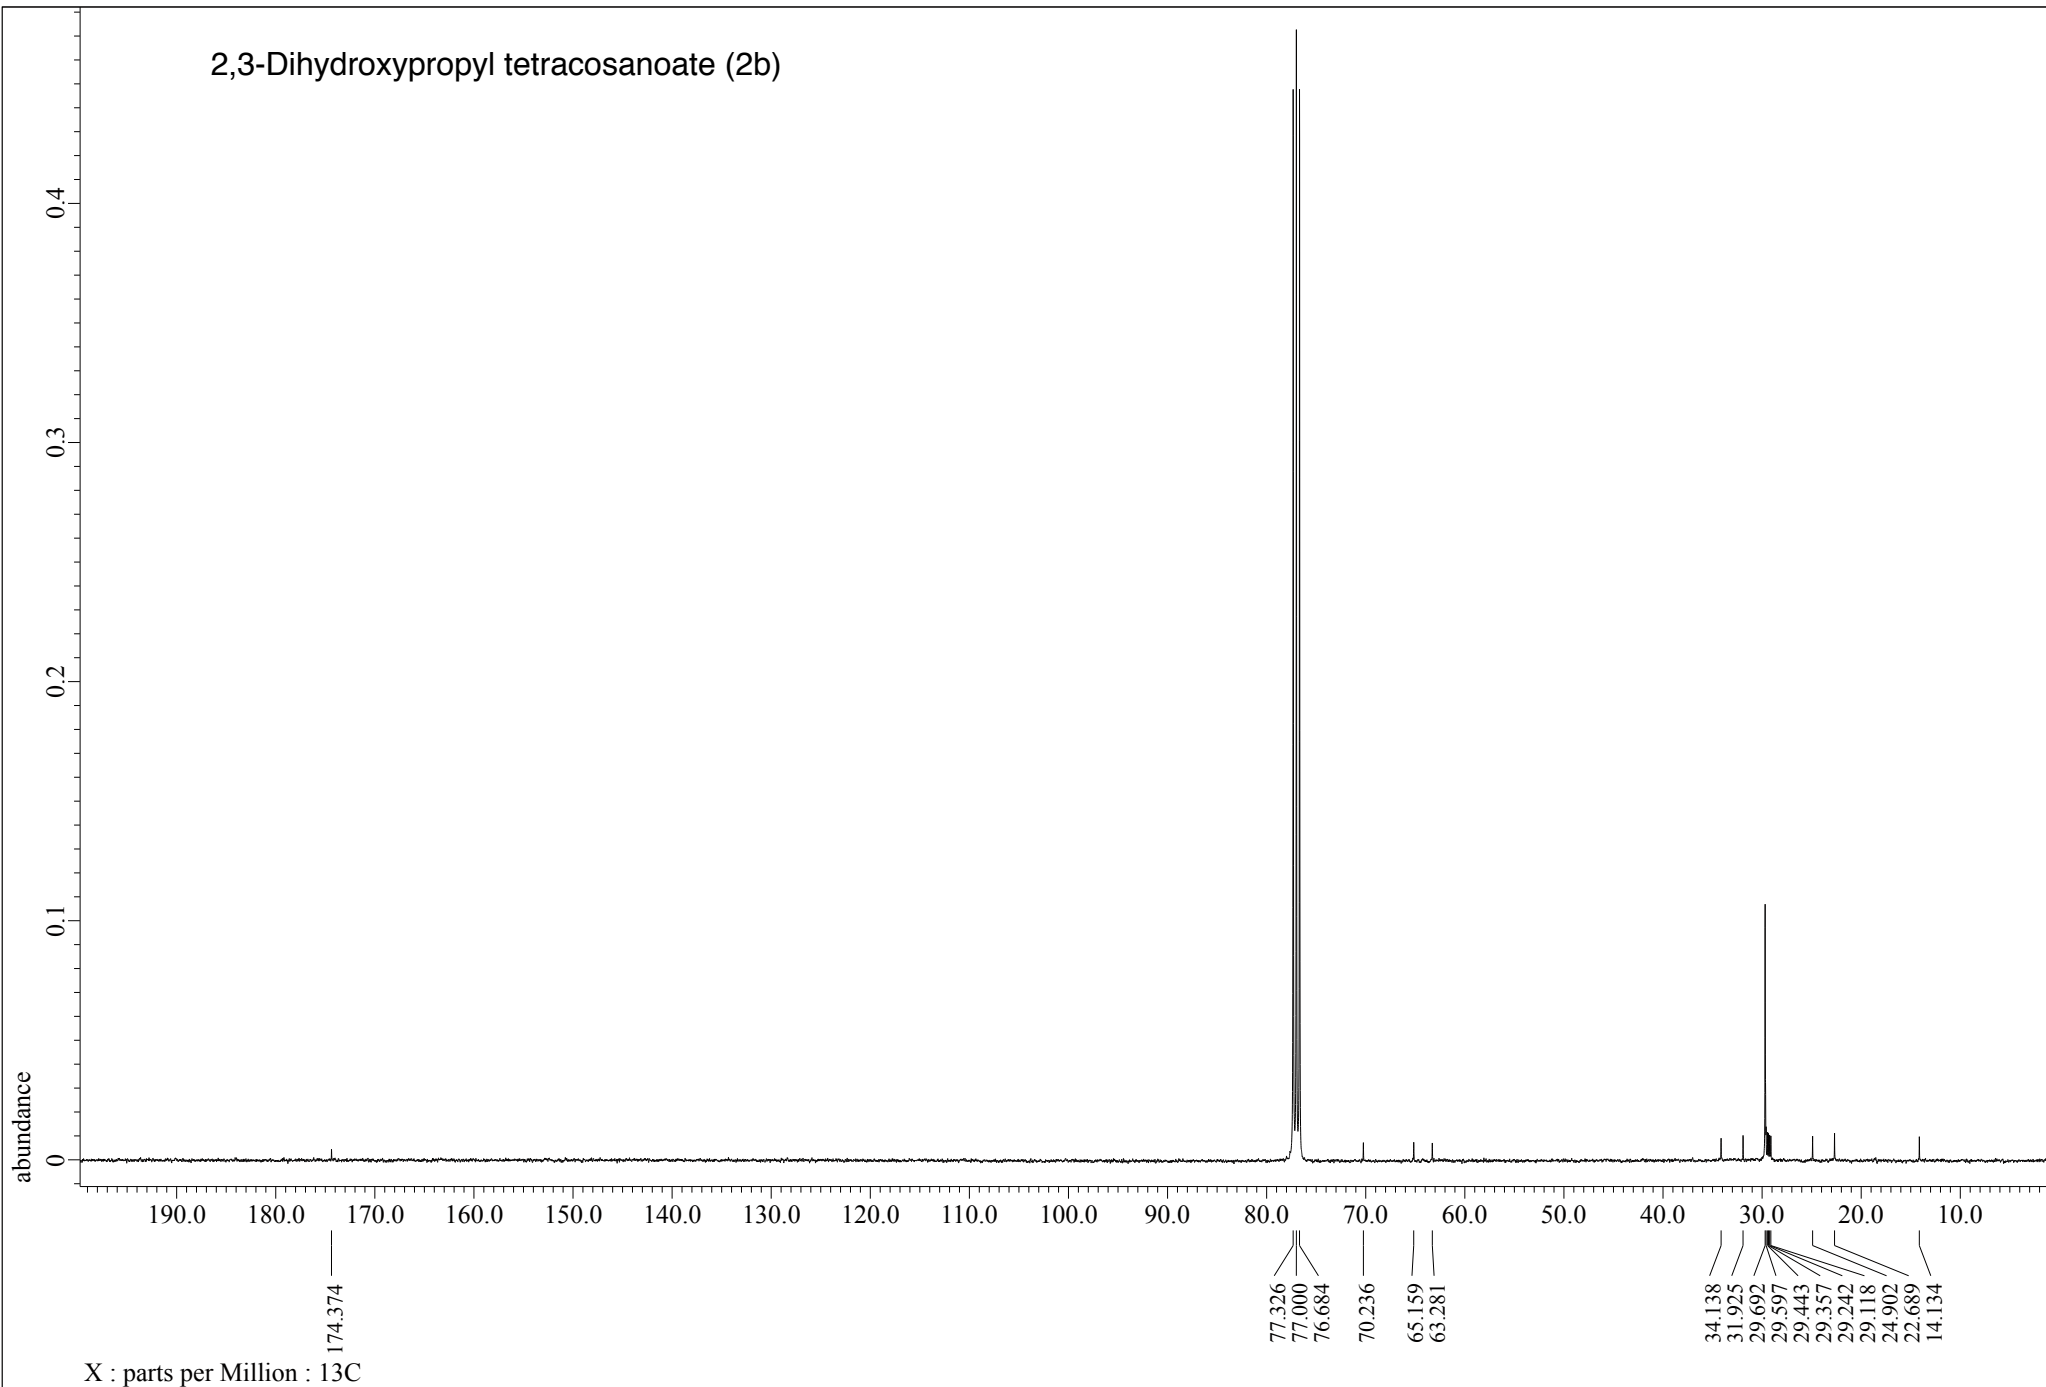

2,3-Dihydroxypropyl hexacosanoate (2c)

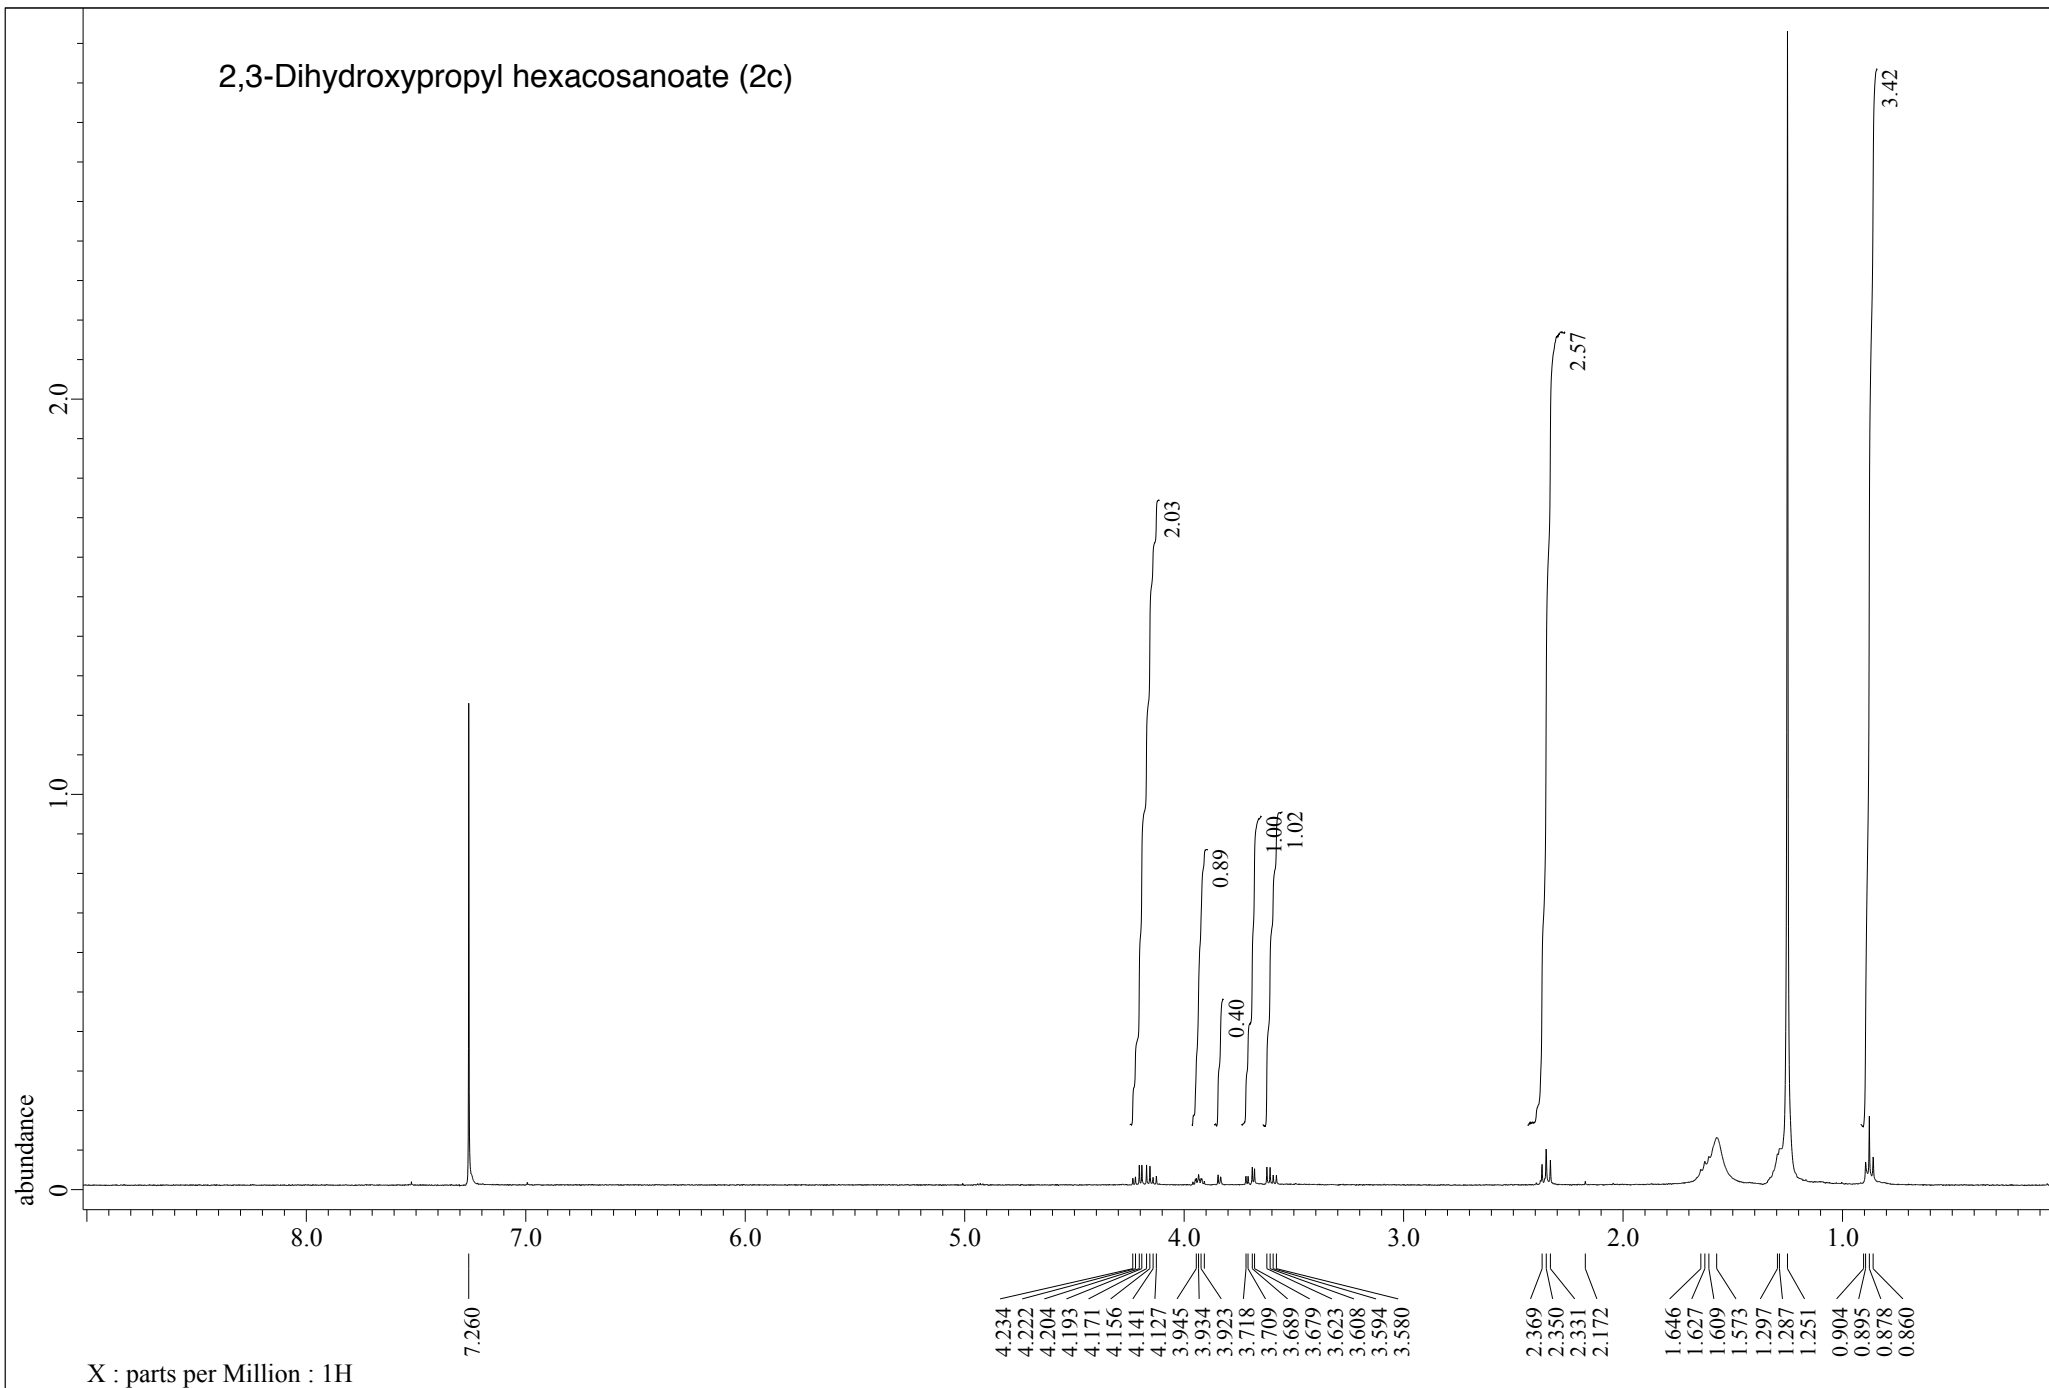

2,3-Dihydroxypropyl hexacosanoate (2c)

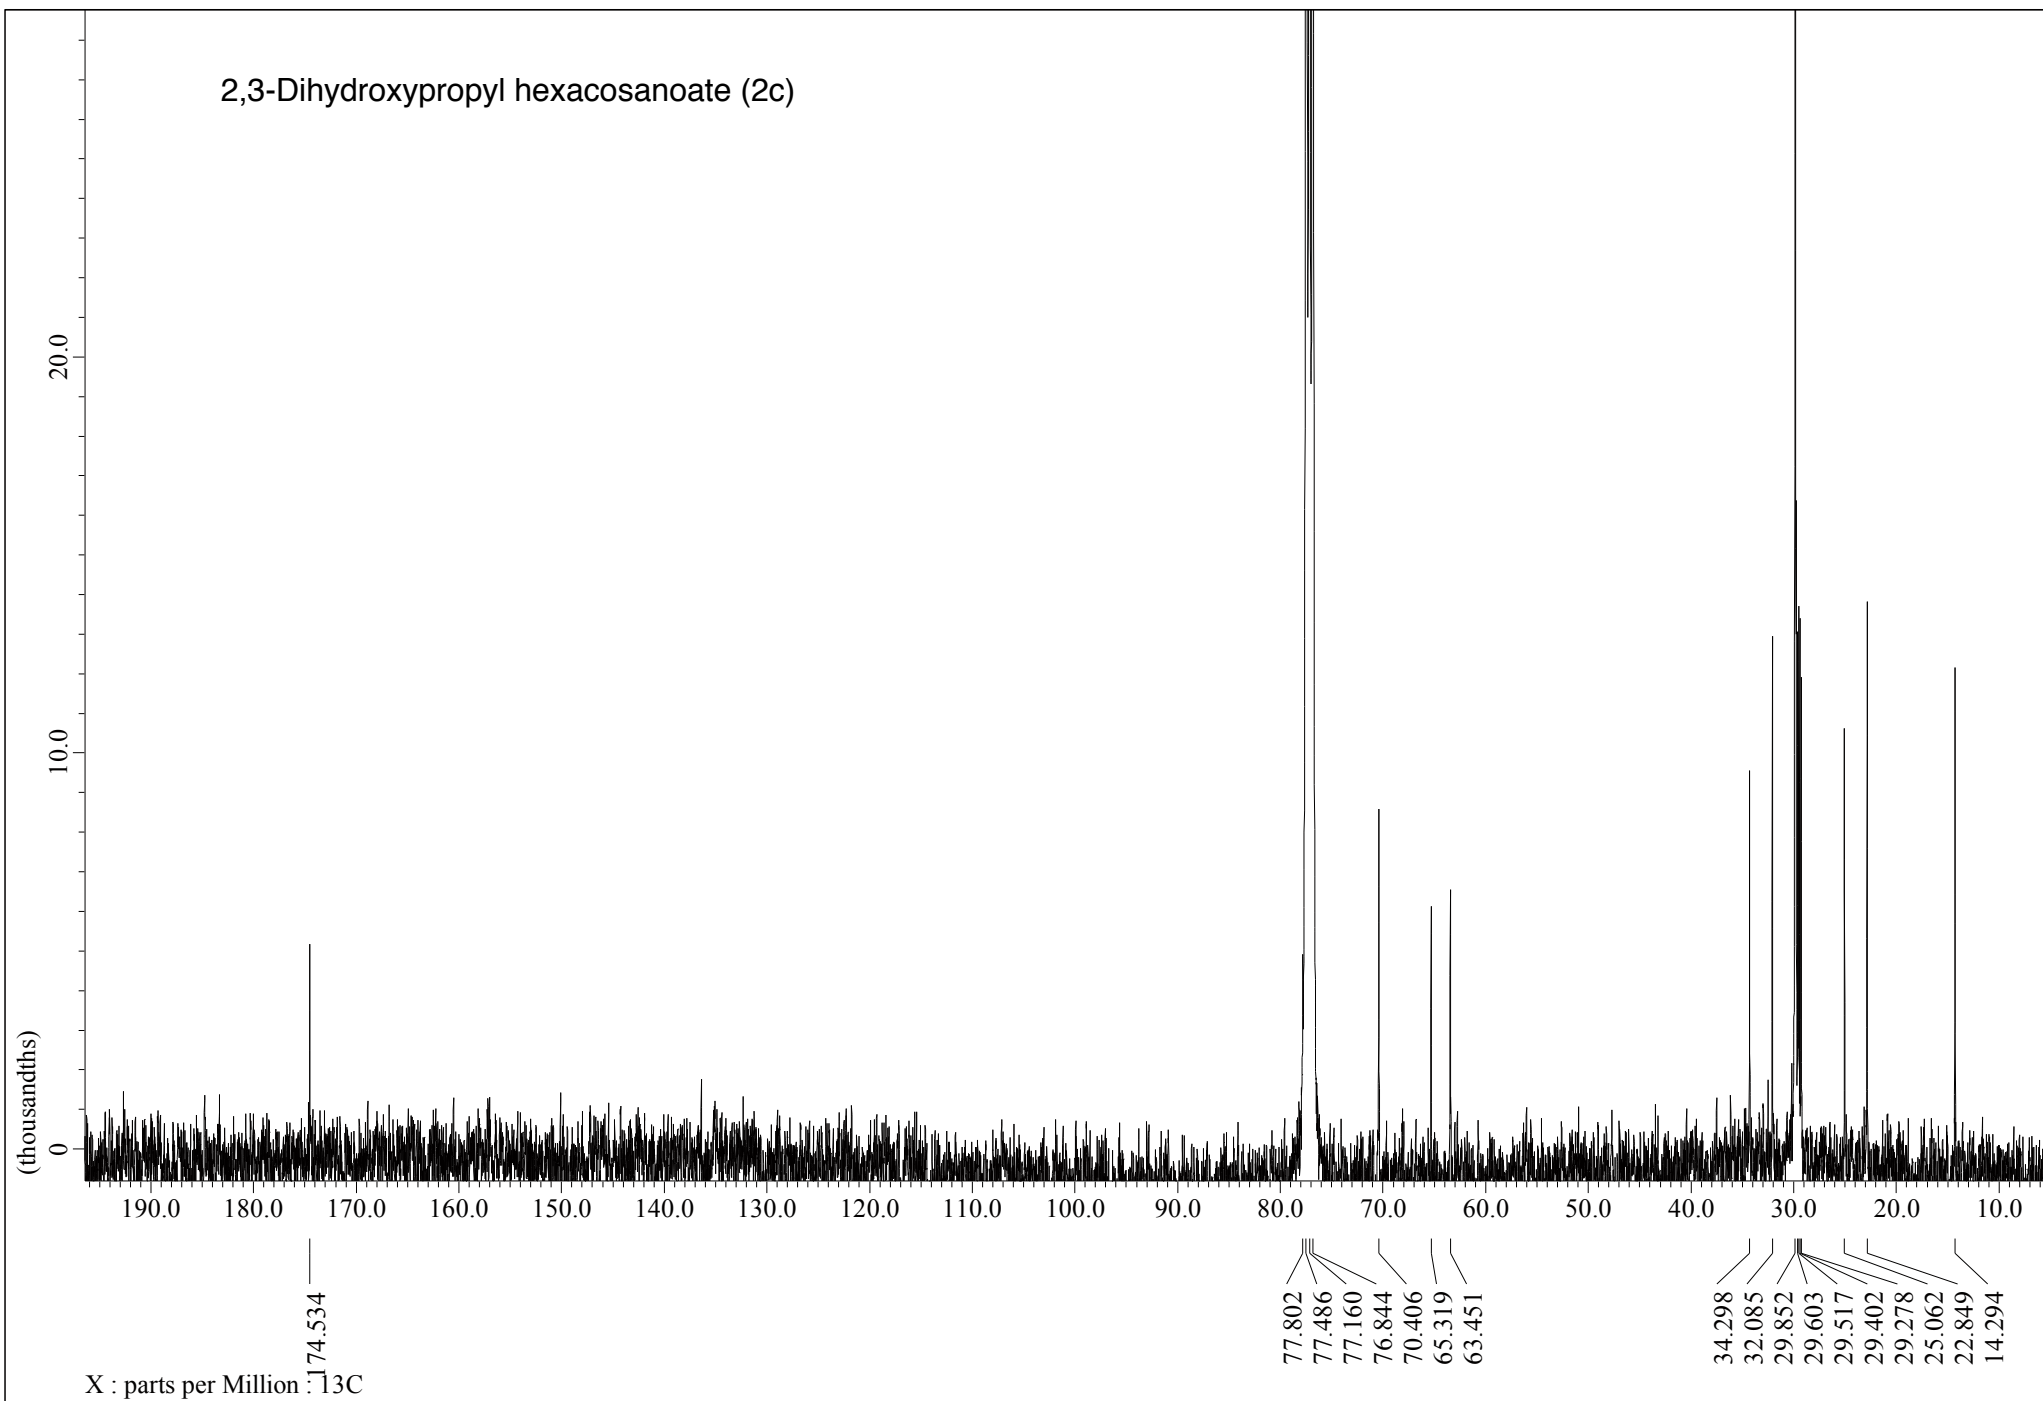

2,3-Dihydroxypropyl octacosanoate (2d)

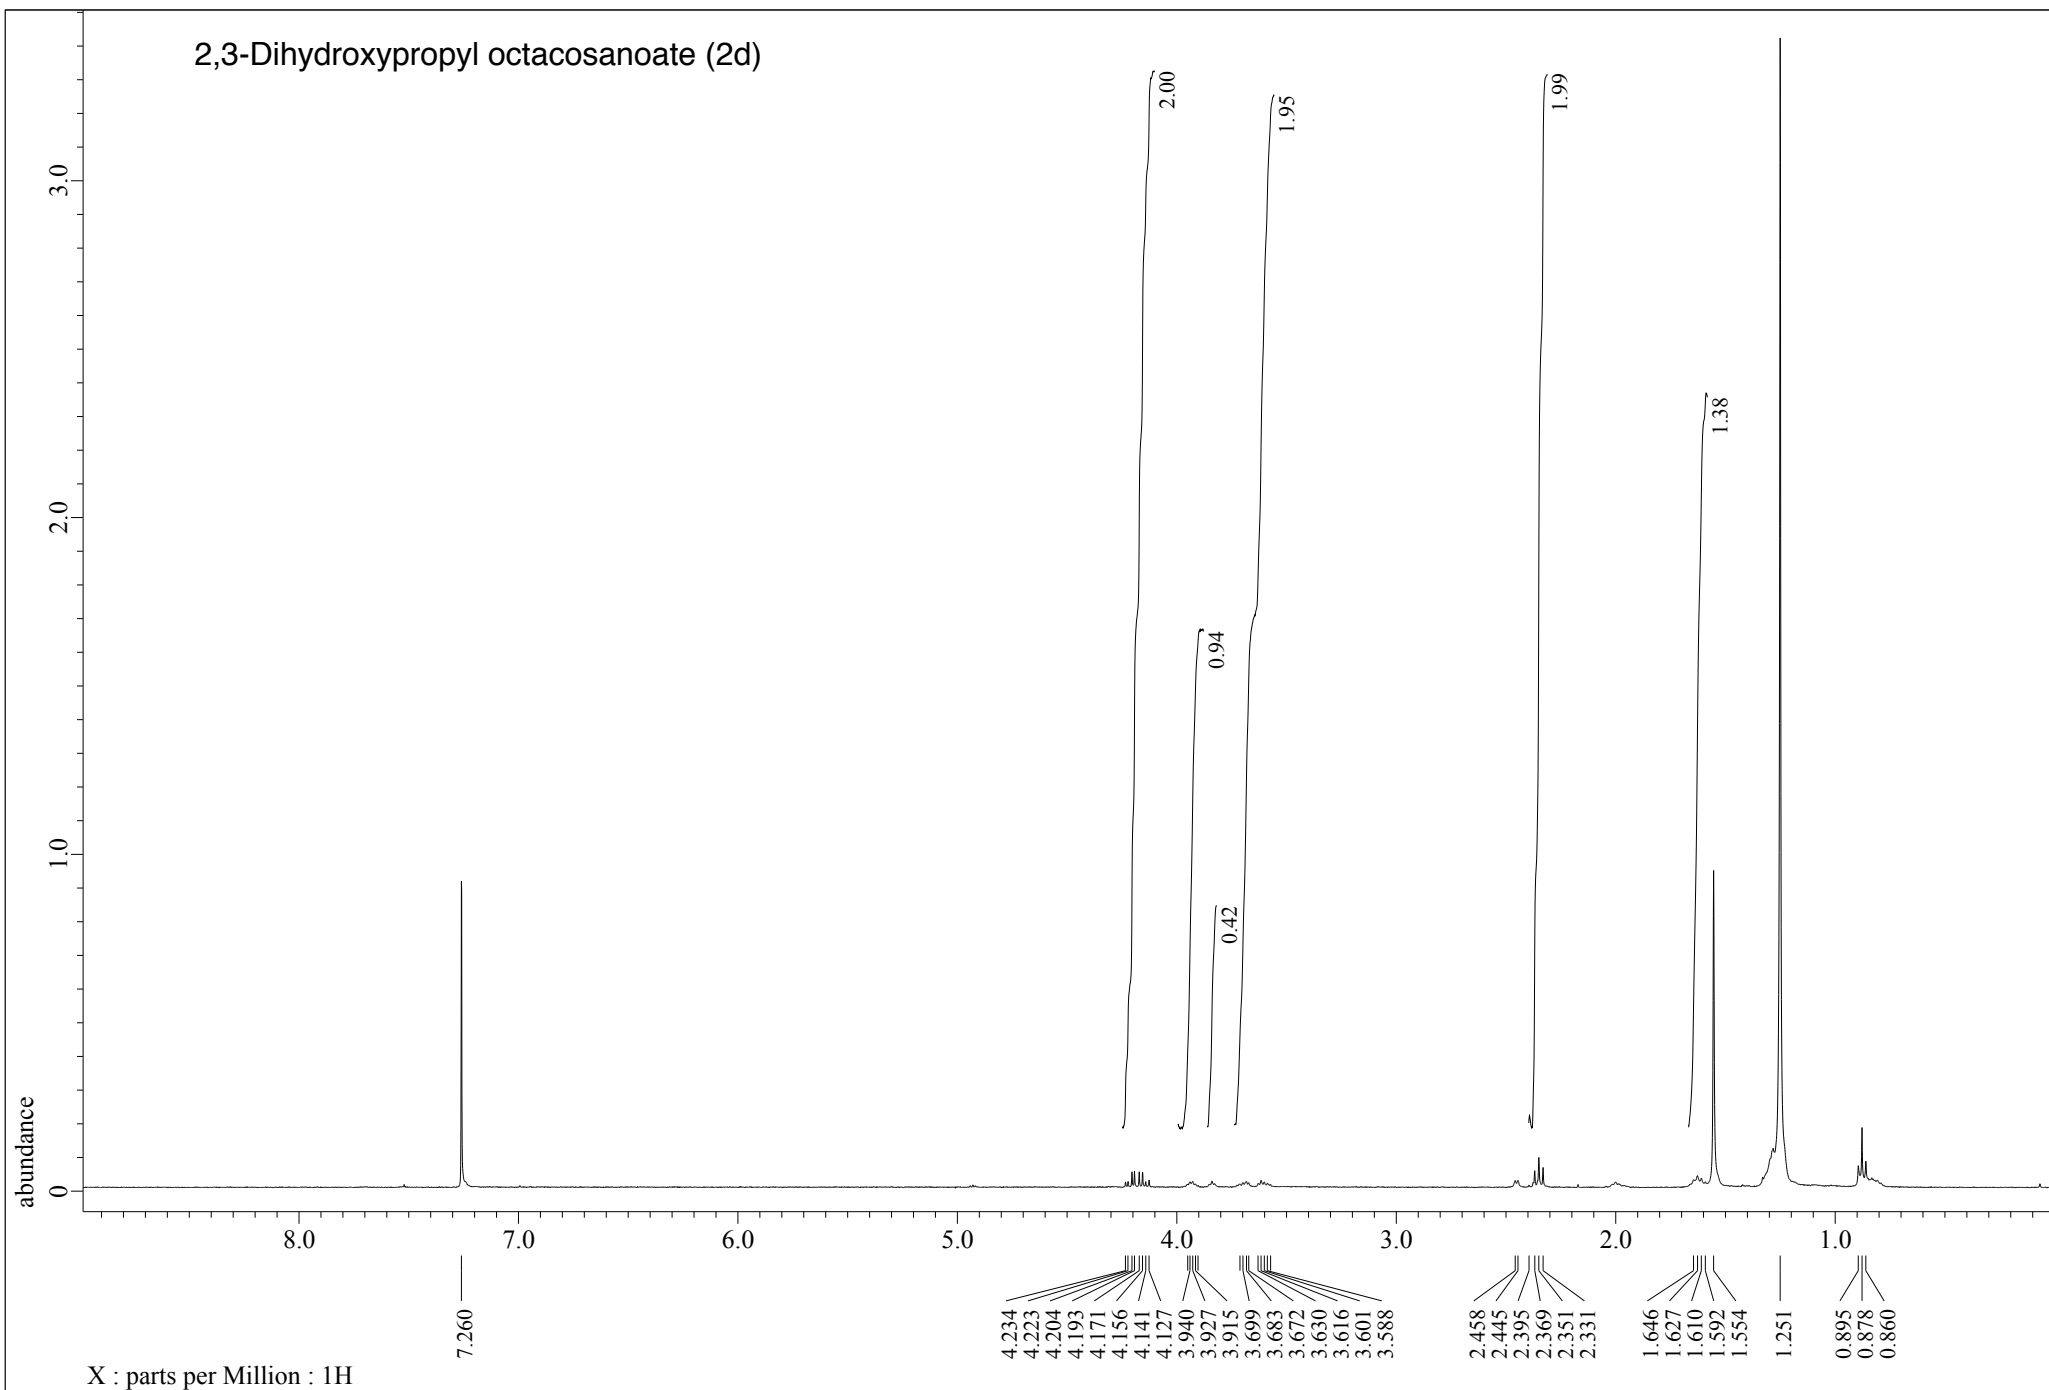

2,3-Dihydroxypropyl octacosanoate (2d)

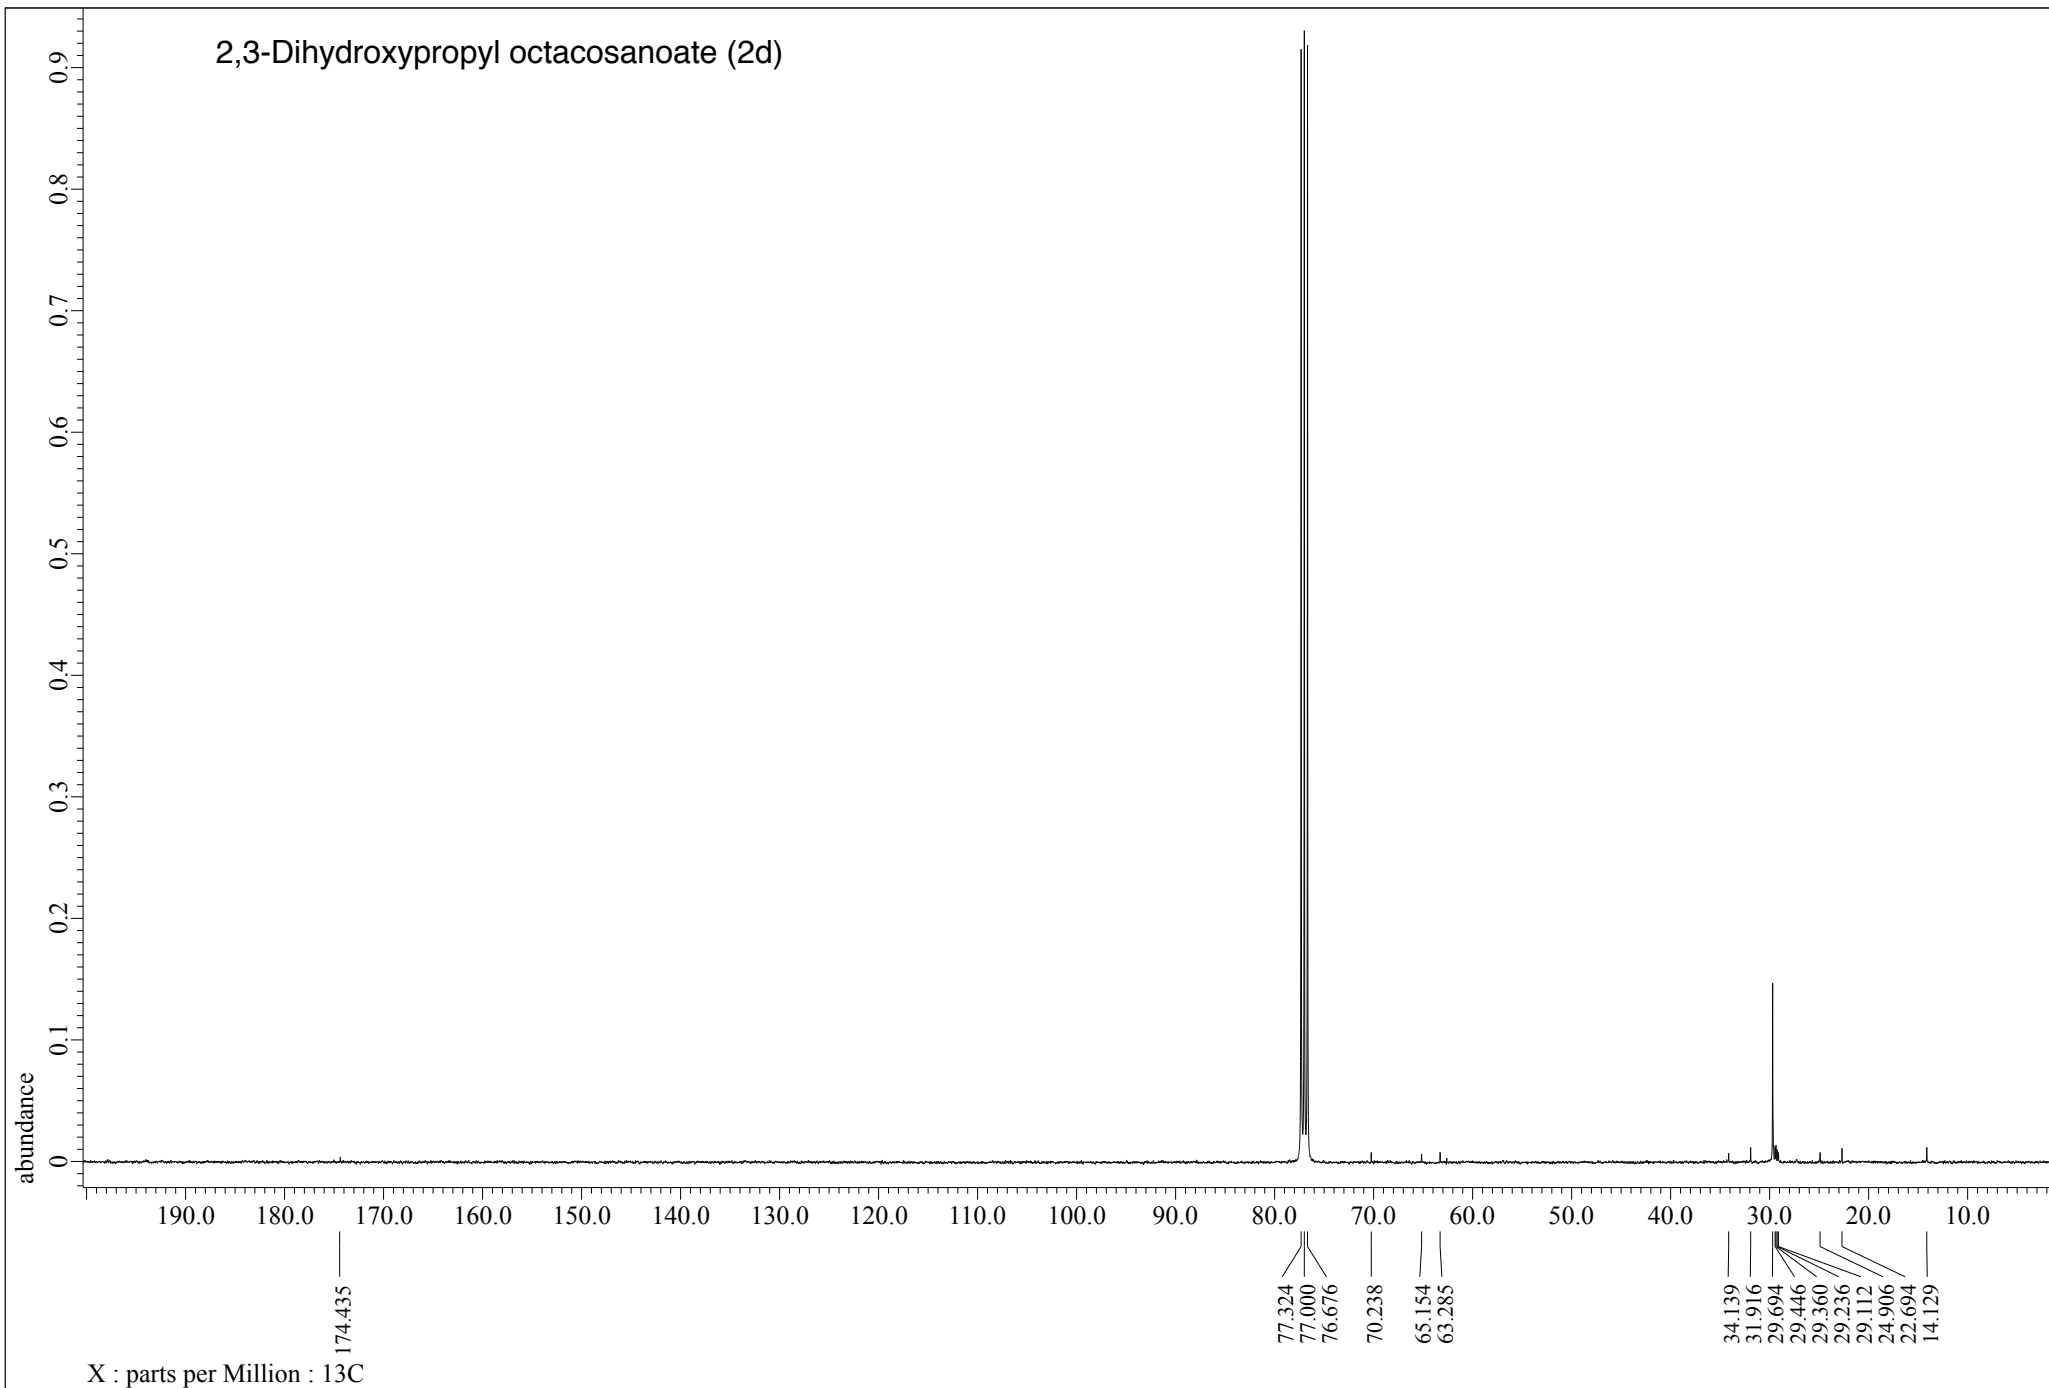

X : parts per Million : <sup>13</sup>C



2,3-Dihydroxypropyl triacontanoate (2e)

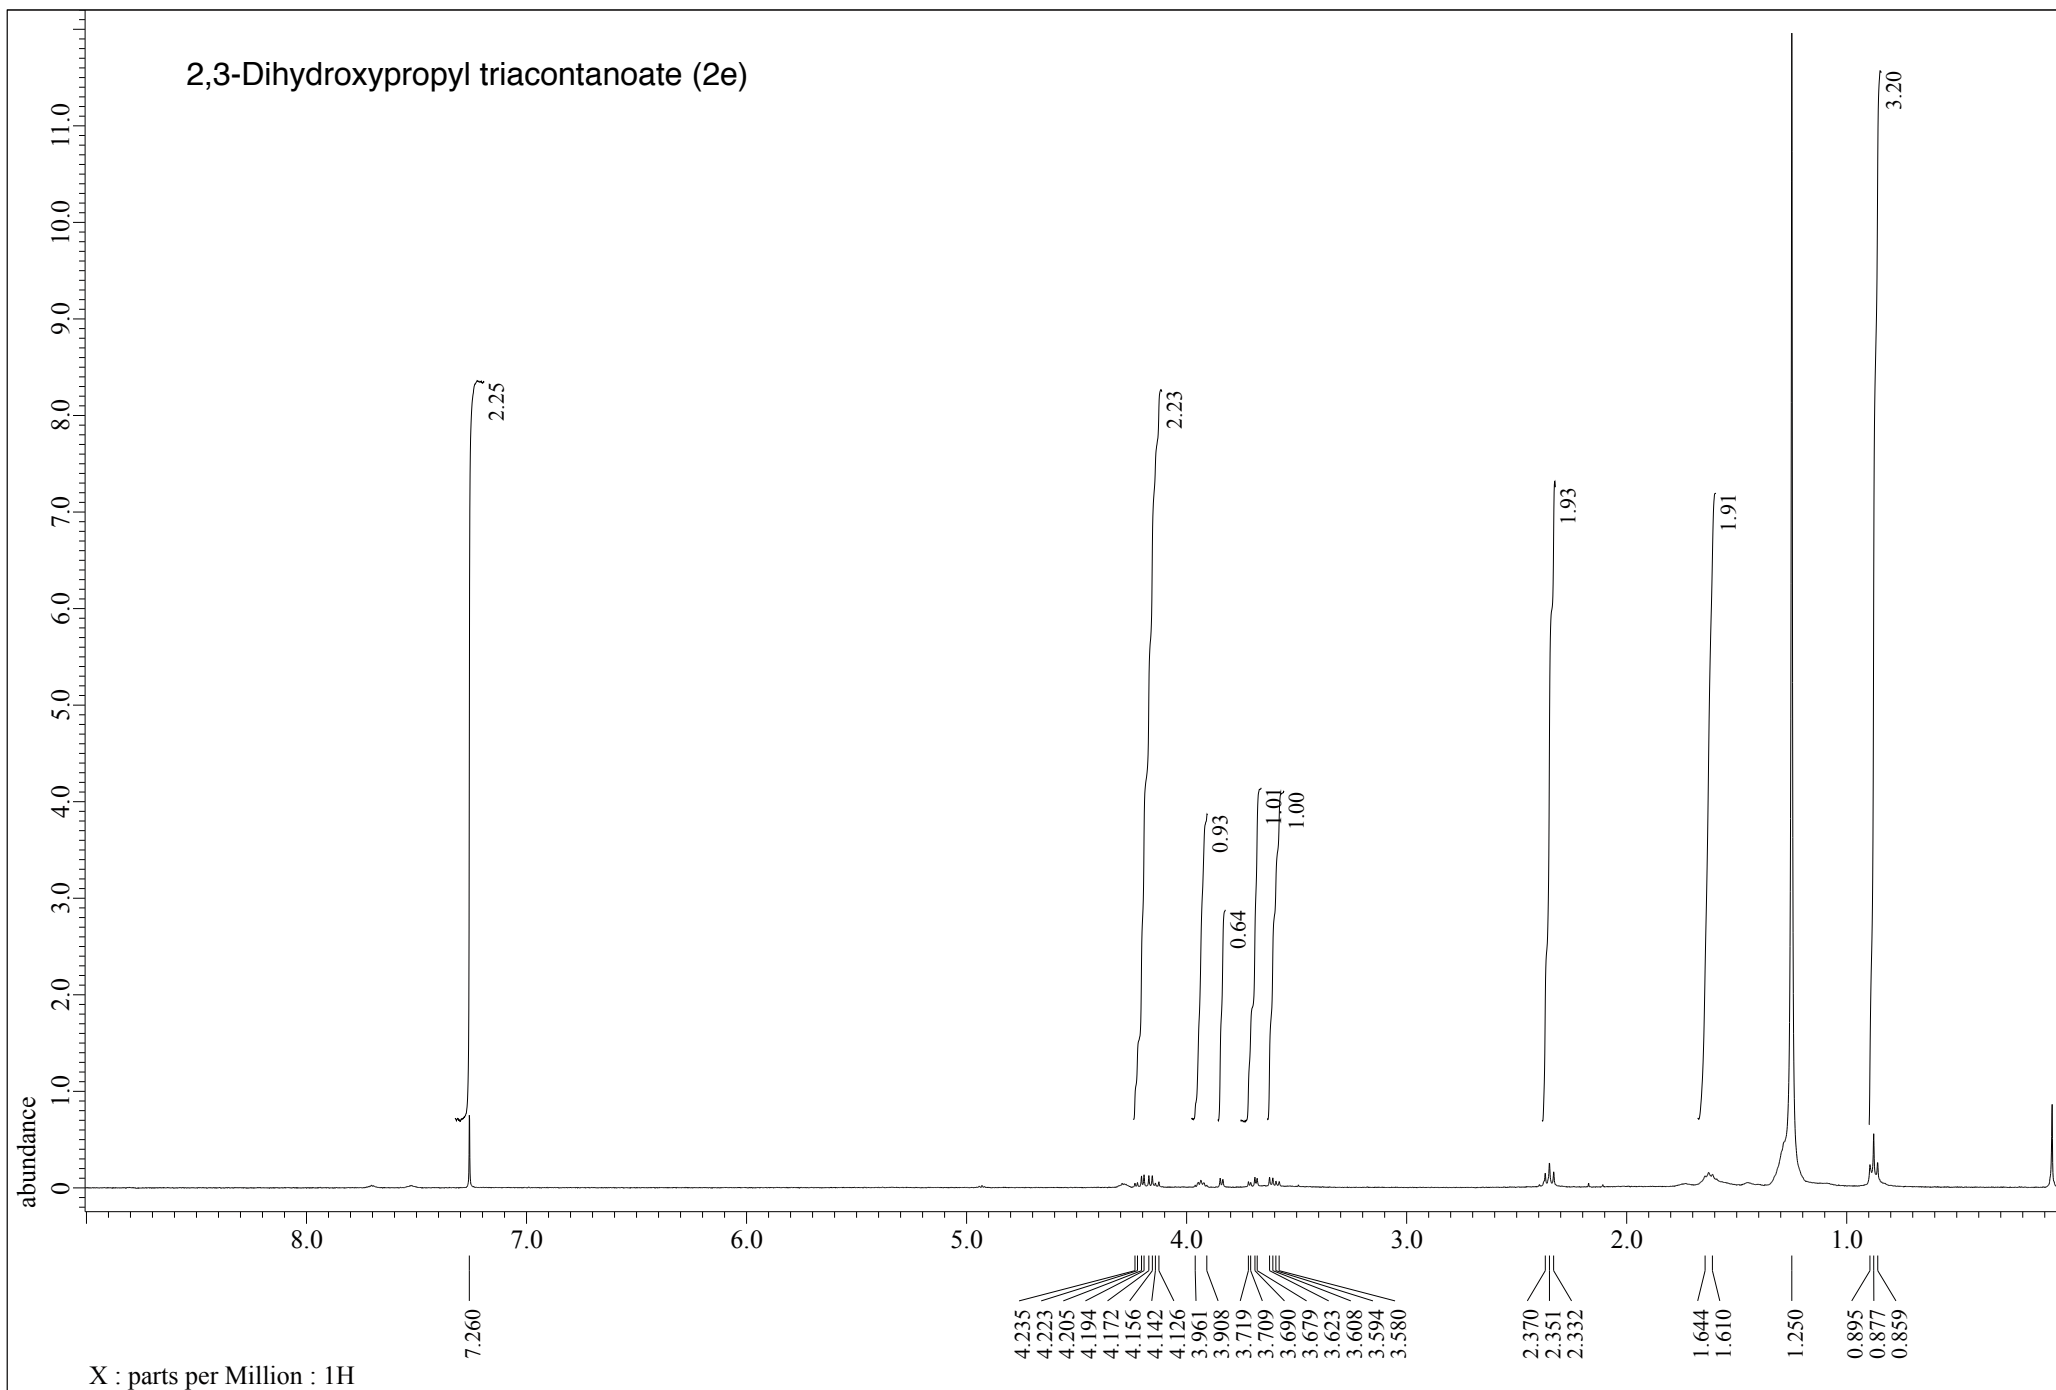

ri13-1-2 data-1.jdf  
ecx400

(2,2-Dimethyl-1,3-dioxolan-4-yl)methyl benzoate (4a)

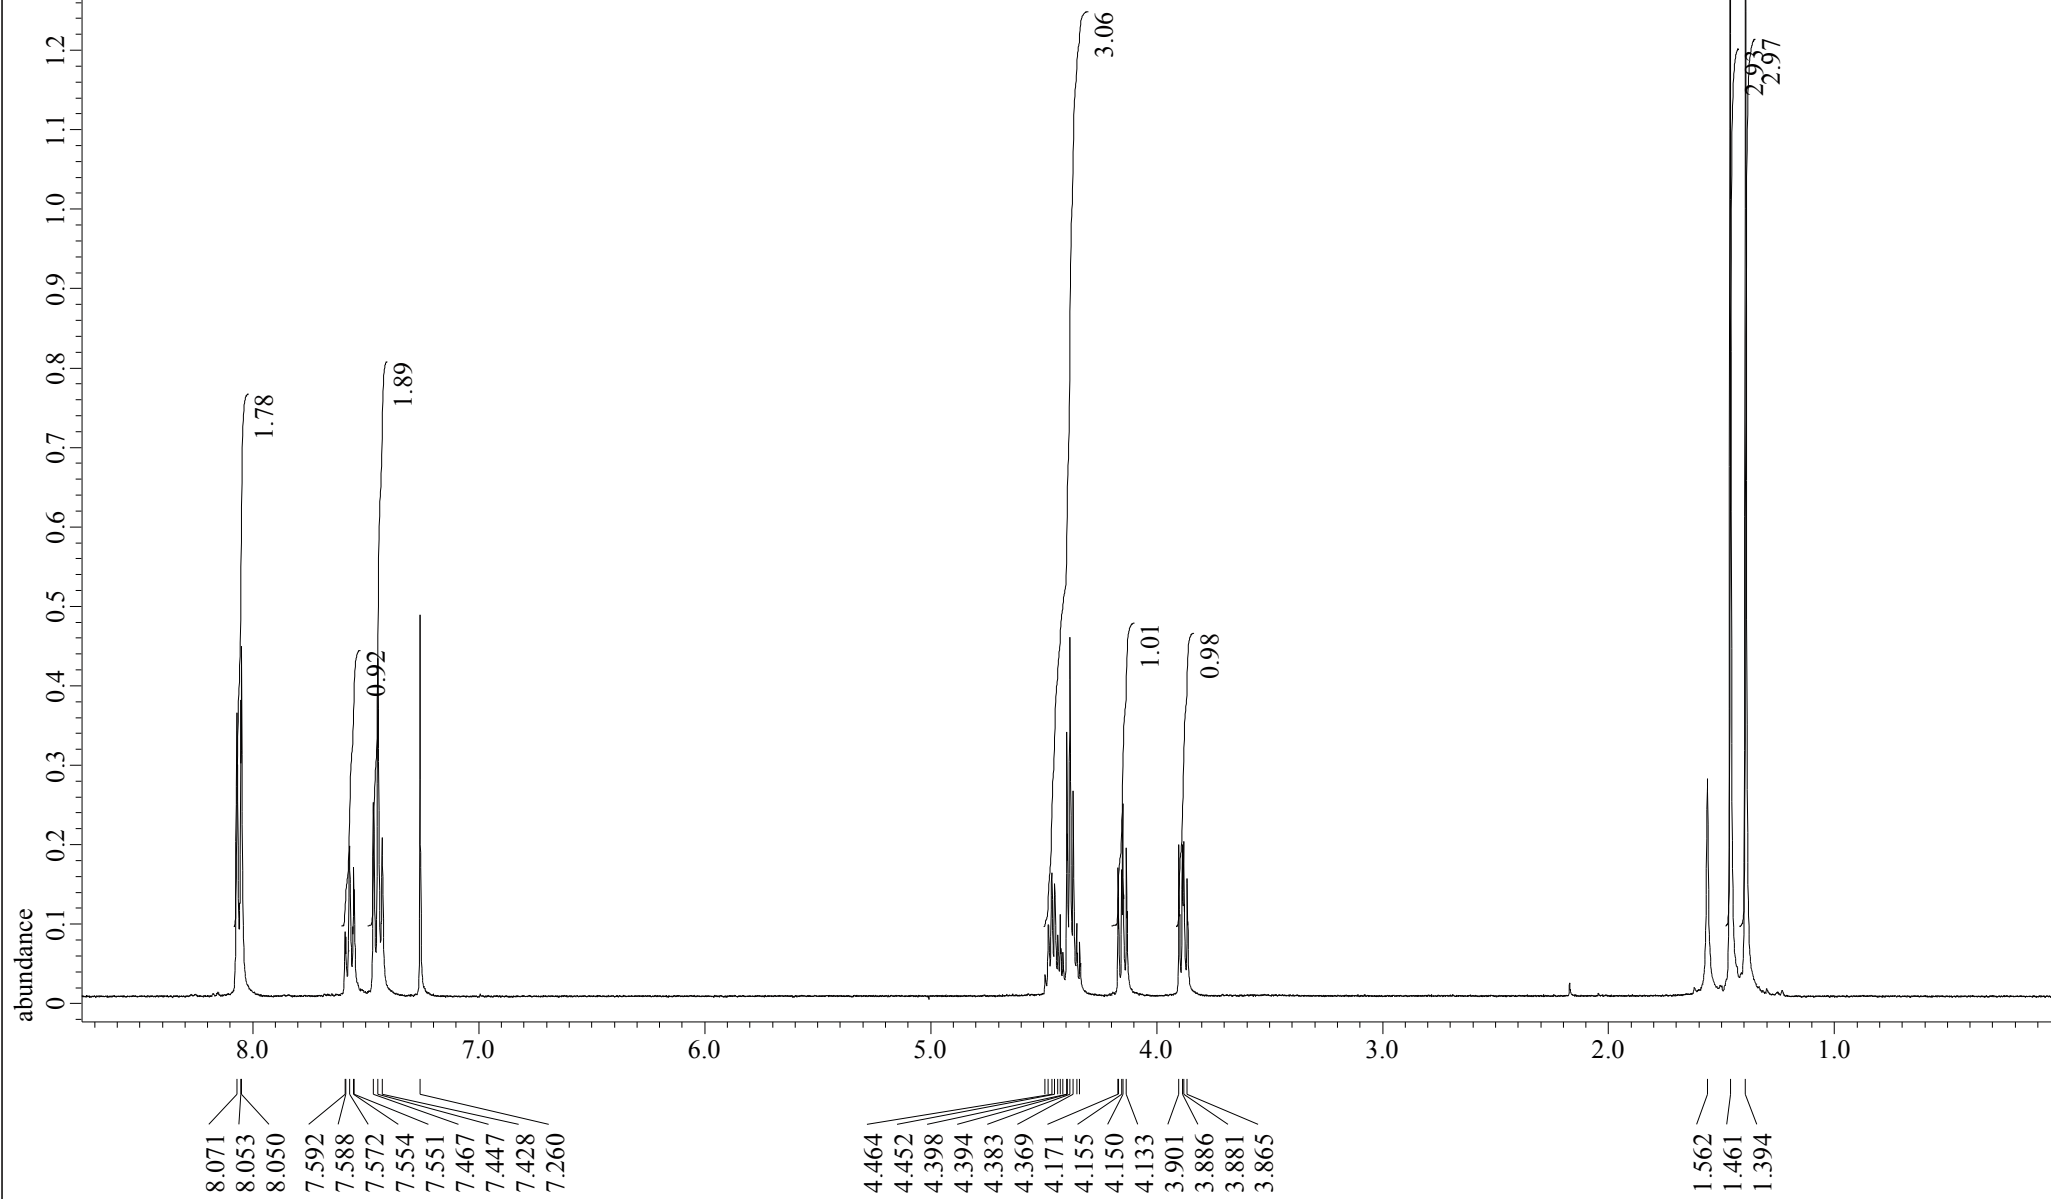

X : parts per Million : 1H

ri61cHPLC data-2.jdf  
160125 eca500

(2,2-Dimethyl-1,3-dioxolan-4-yl)methyl 4-(octyloxy)benzoate (4b)

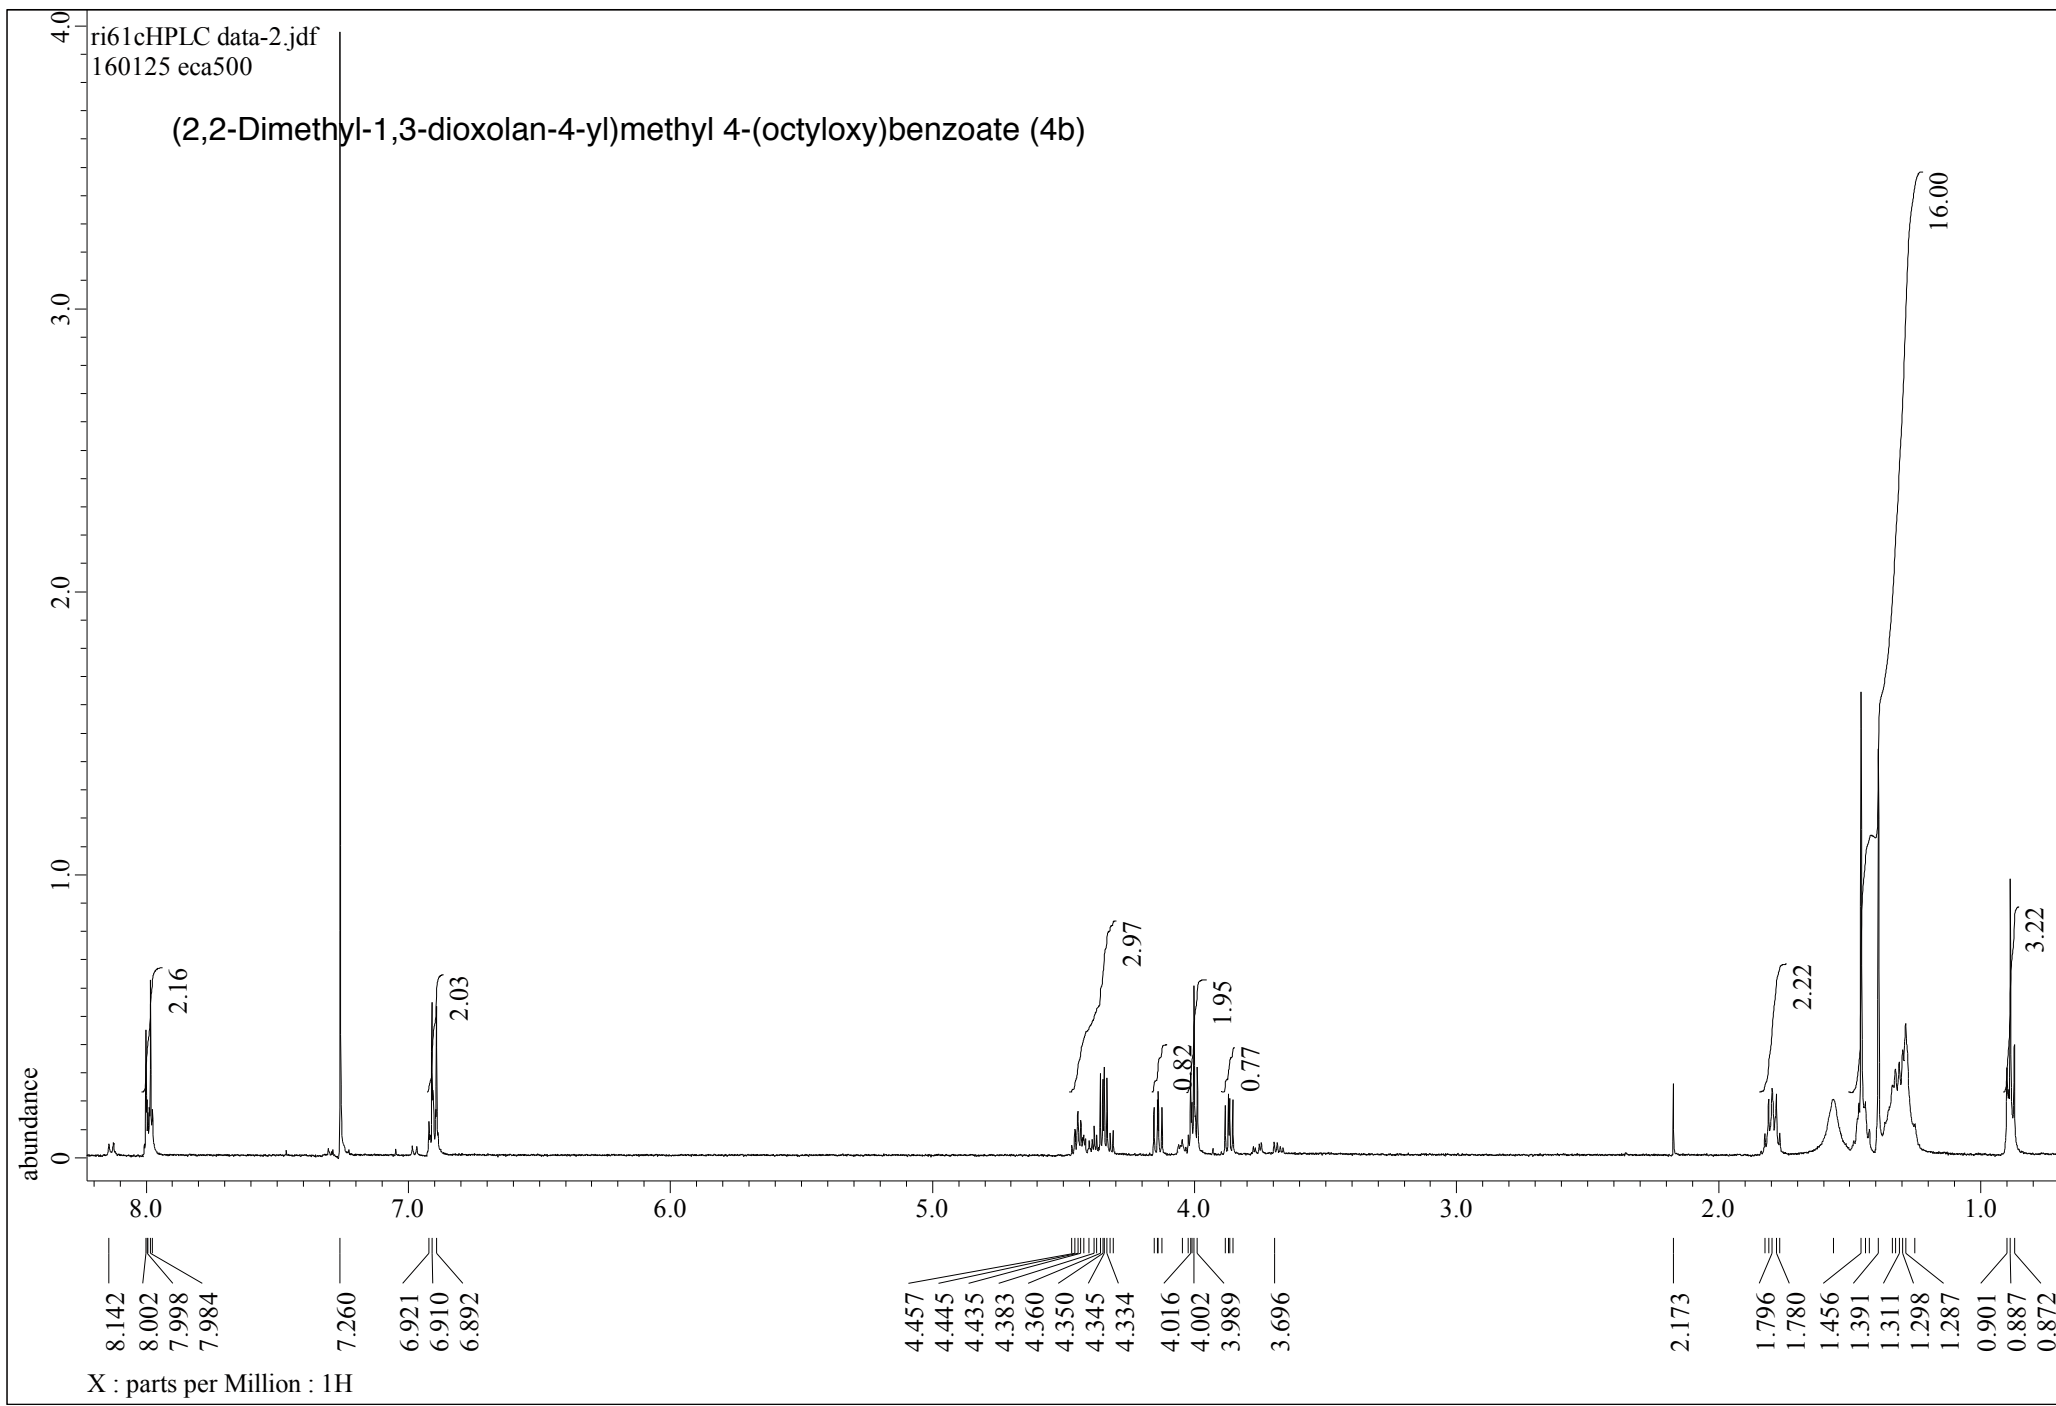

X : parts per Million : 1H

ri19 MeOH data-1.jdf  
ecx400P 170222

### 2,3-Dihydroxypropyl benzoate (5a)

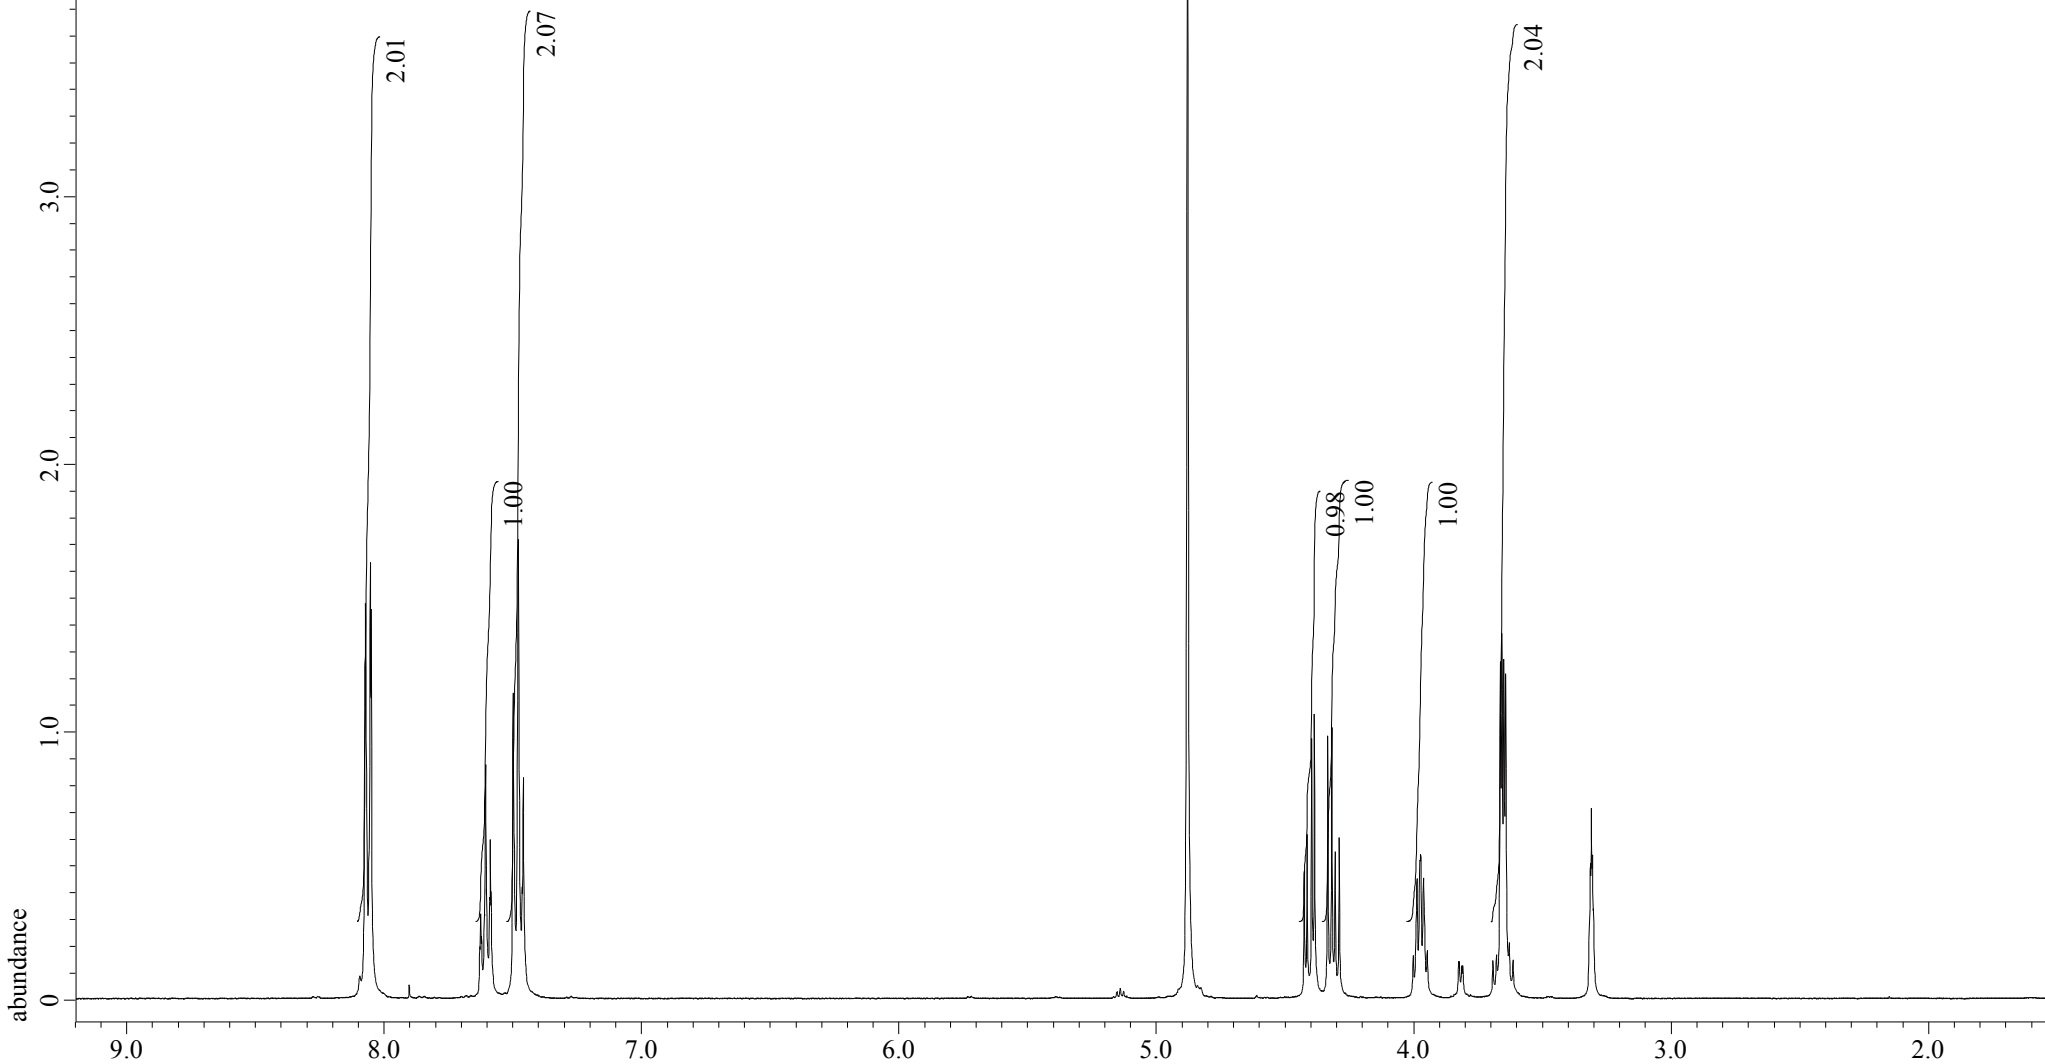

8.095  
8.072  
8.054  
8.050  
7.624  
7.606  
7.602  
7.588  
7.584  
7.499  
7.479  
7.464  
7.460

4.879  
4.396  
4.386  
4.334  
4.318  
3.974  
3.664  
3.658  
3.650  
3.643  
3.313  
3.310  
3.305

X : parts per Million : 1H

2,3-Dihydroxypropyl benzoate (5a)

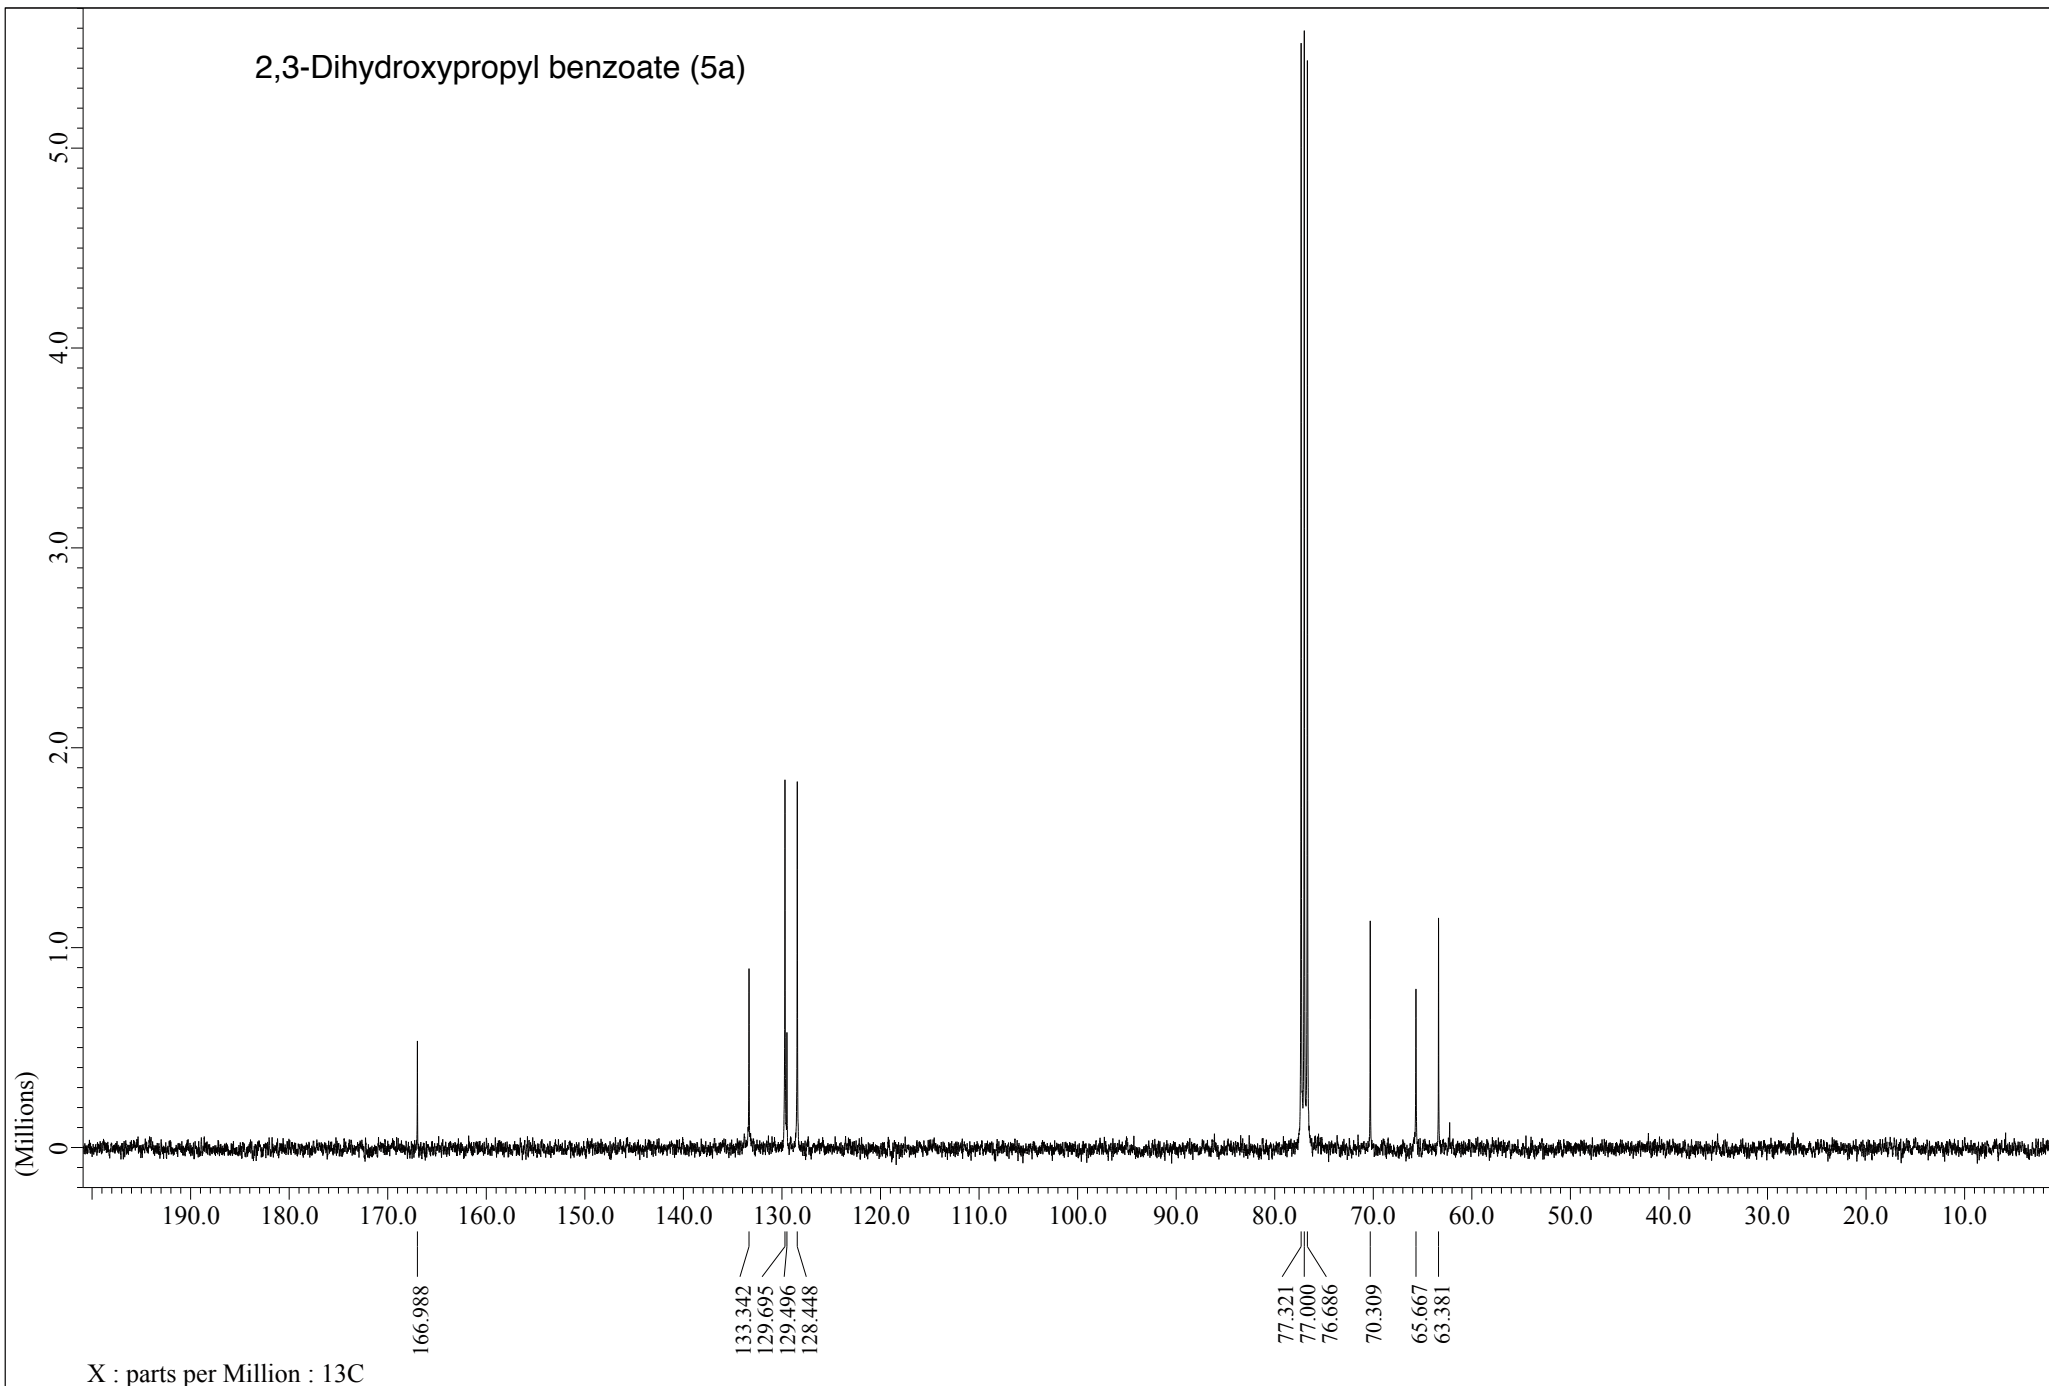

ri62c data-2.jdf  
eca500 160127

### 2,3-Dihydroxypropyl 4-(octyloxy)benzoate (5b)

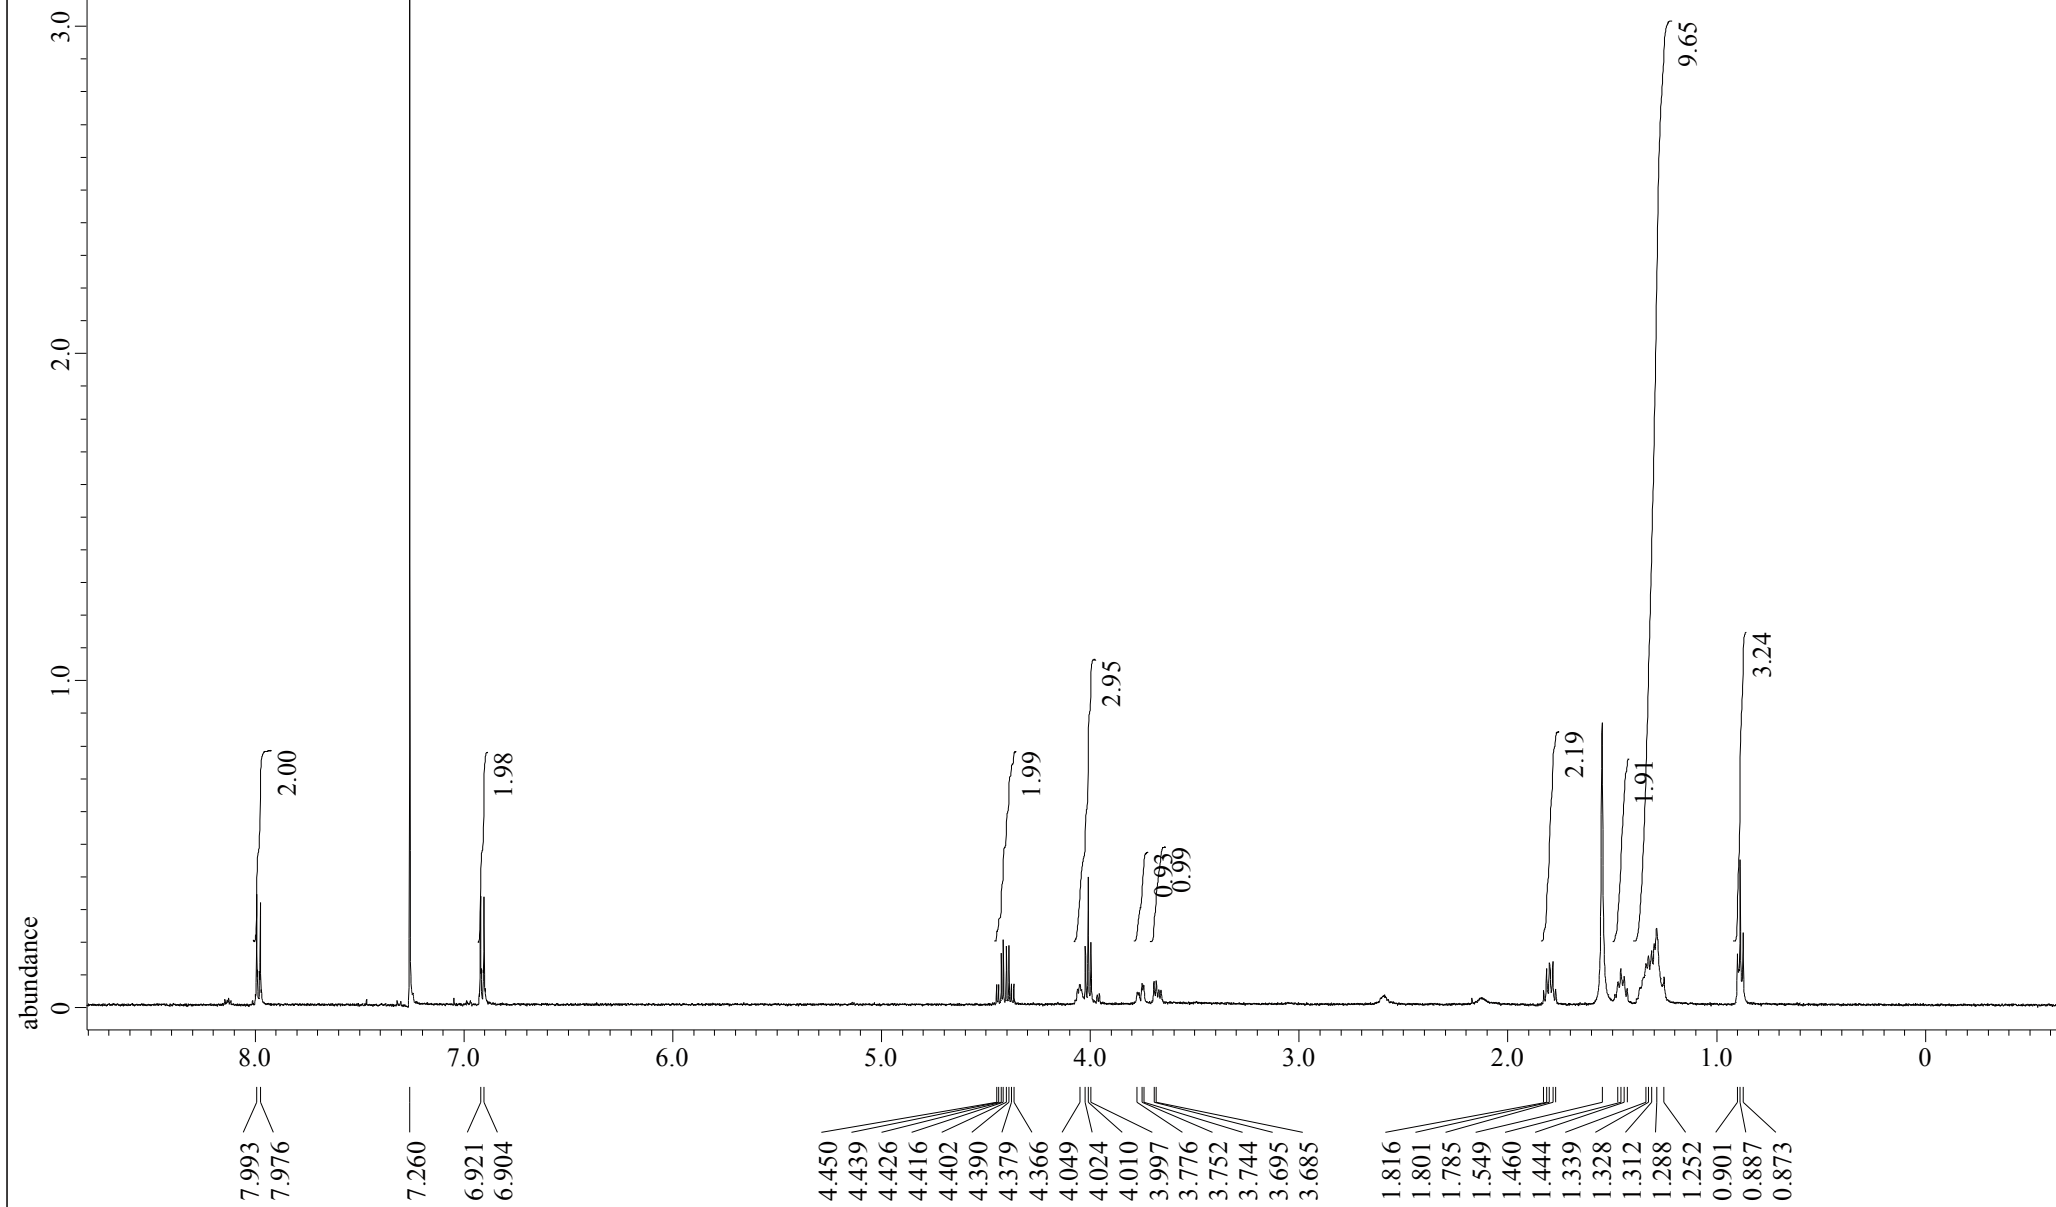

X : parts per Million : 1H

2,3-Dihydroxypropyl 4-(octyloxy)benzoate (5b)

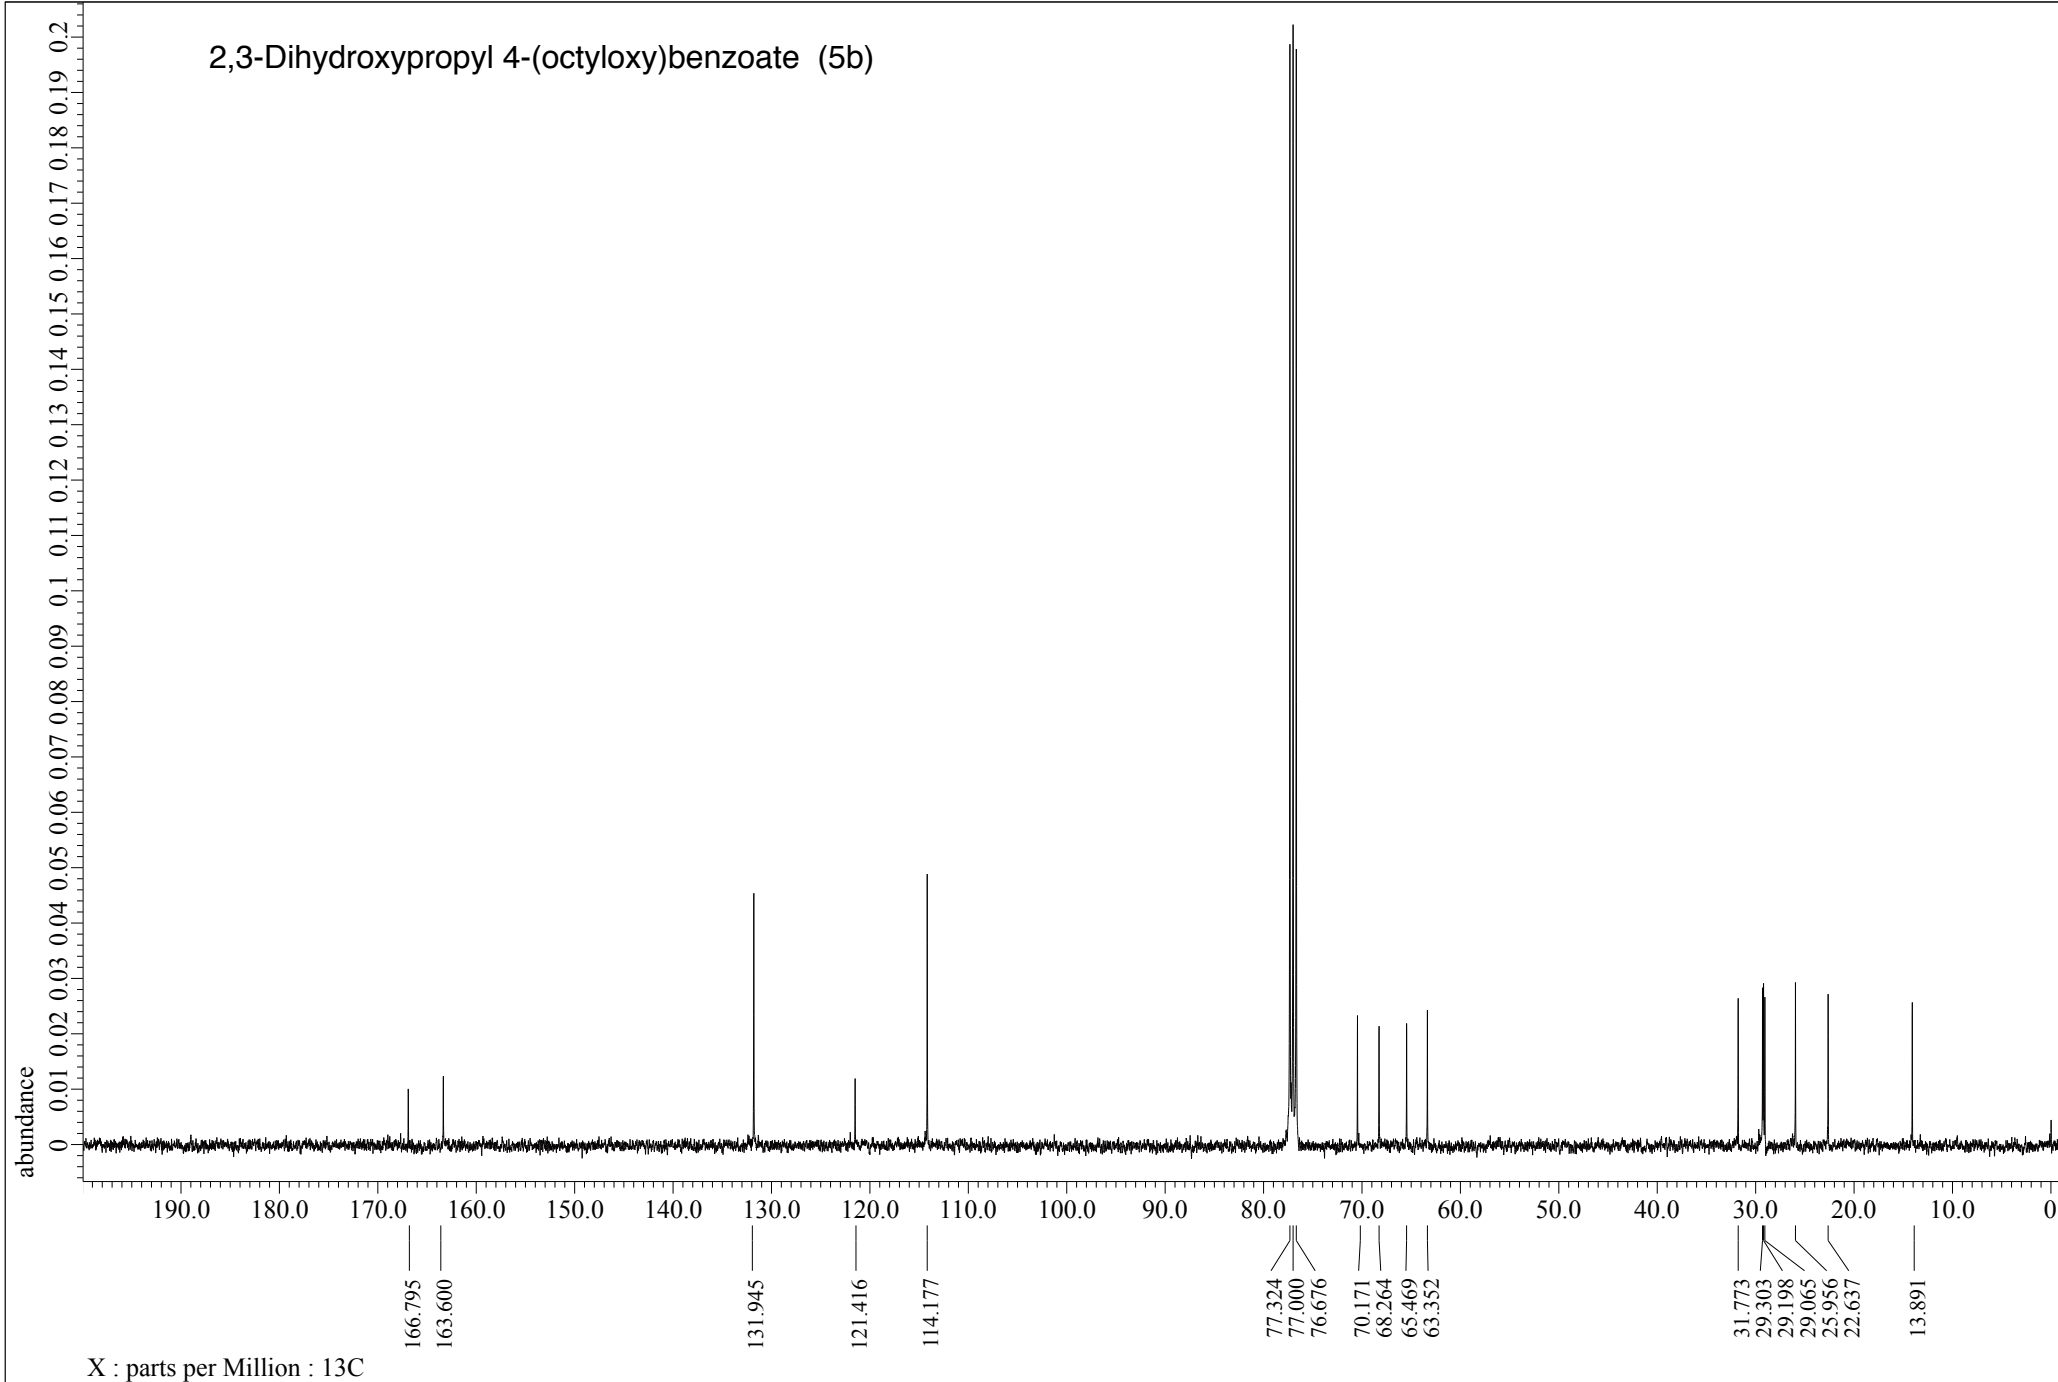

ri14-3.jdf  
single\_pulse

(2,2-Dimethyl-1,3-dioxolan-4-yl)methyl 2-phenylacetate (7a)

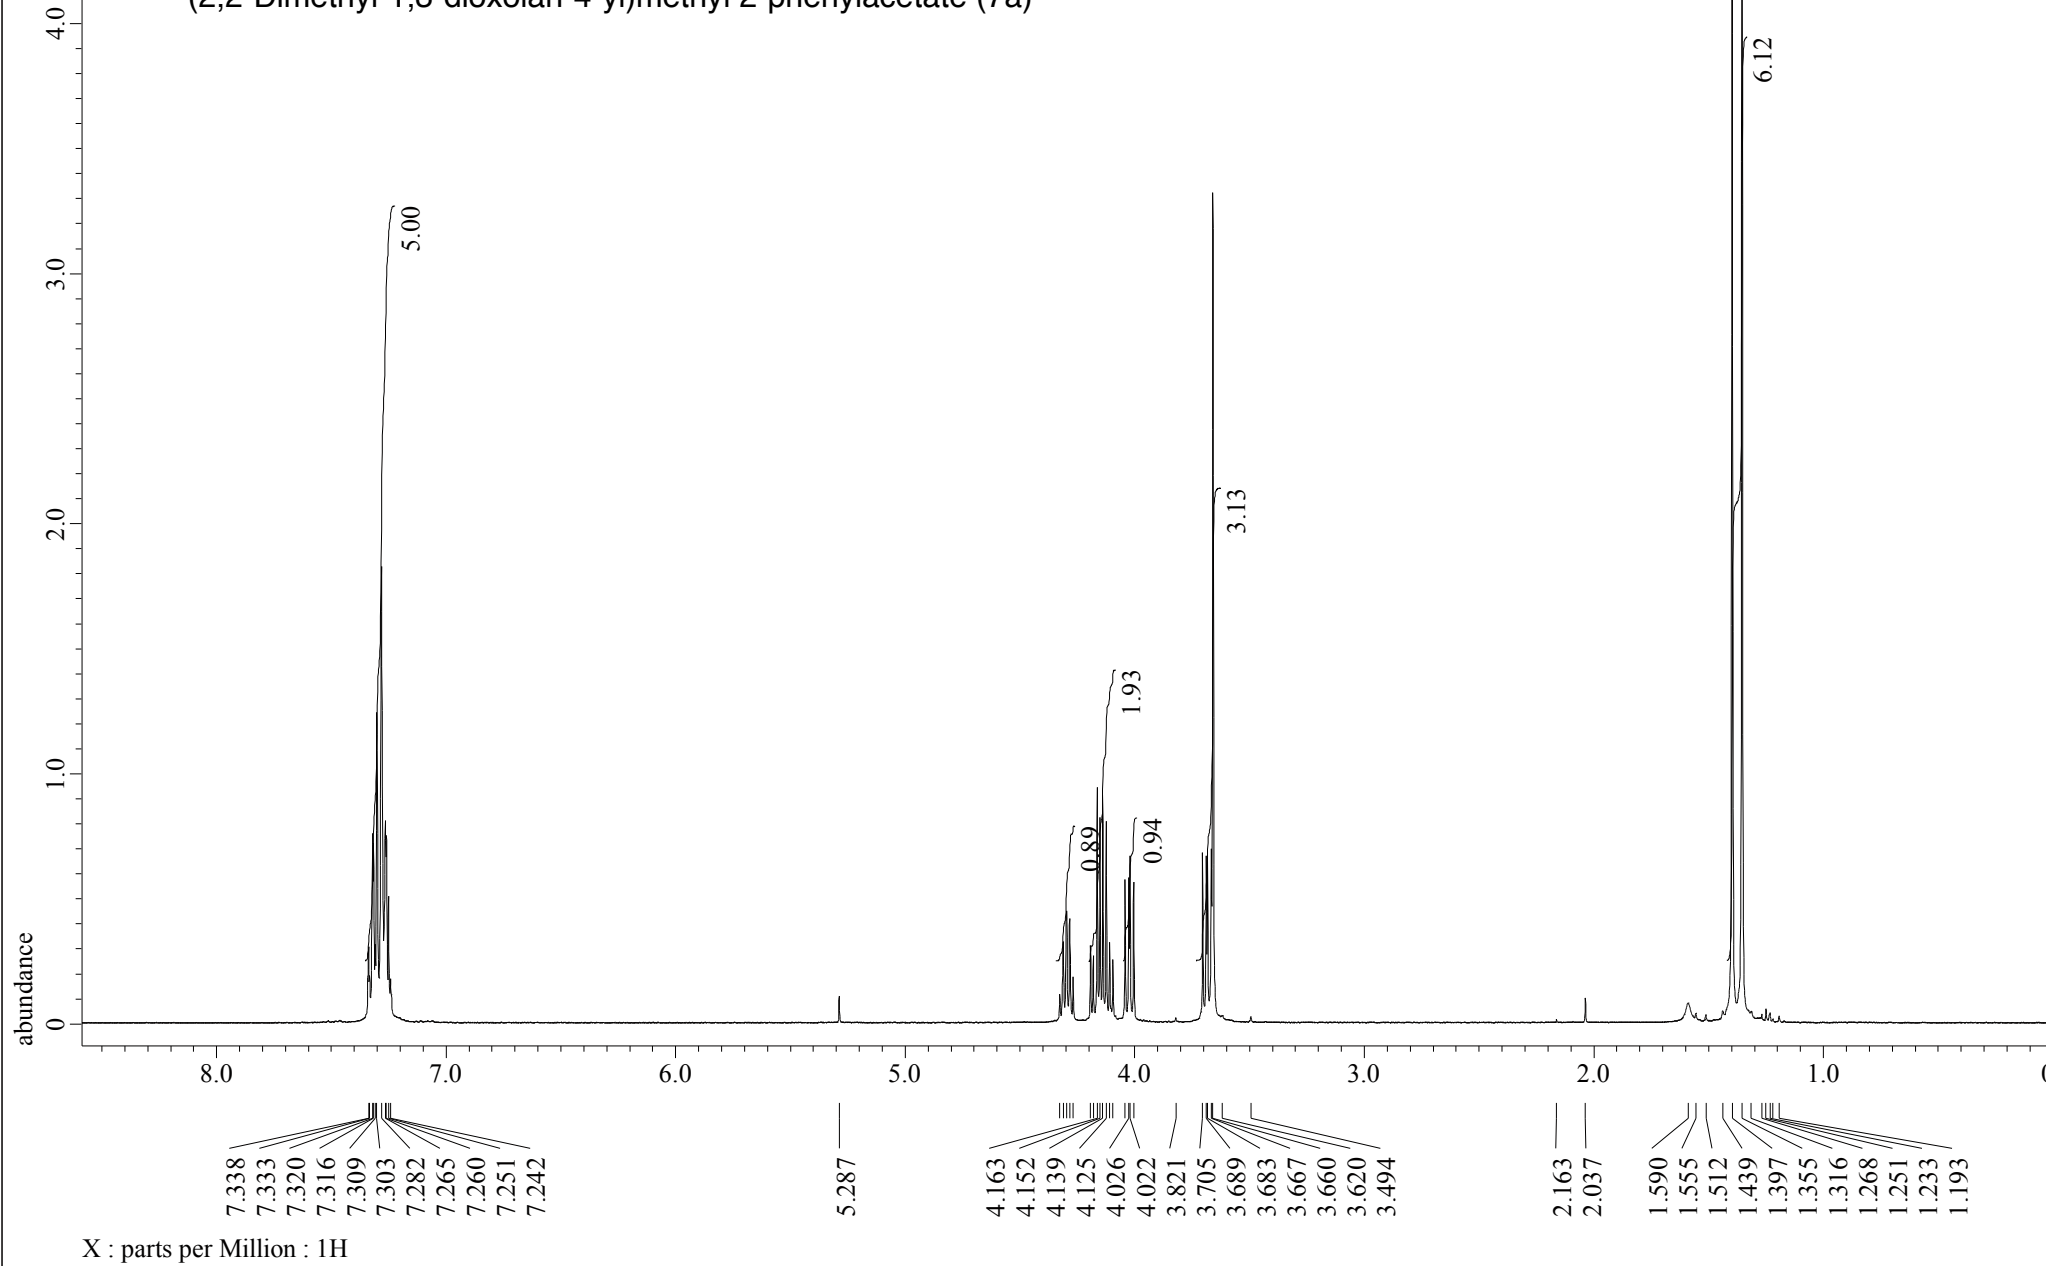



ri501612066 data-2.jdf  
1612066eca500

(2,2-Dimethyl-1,3-dioxolan-4-yl)methyl 2-(4-(octyloxy)phenyl)acetate (7b)

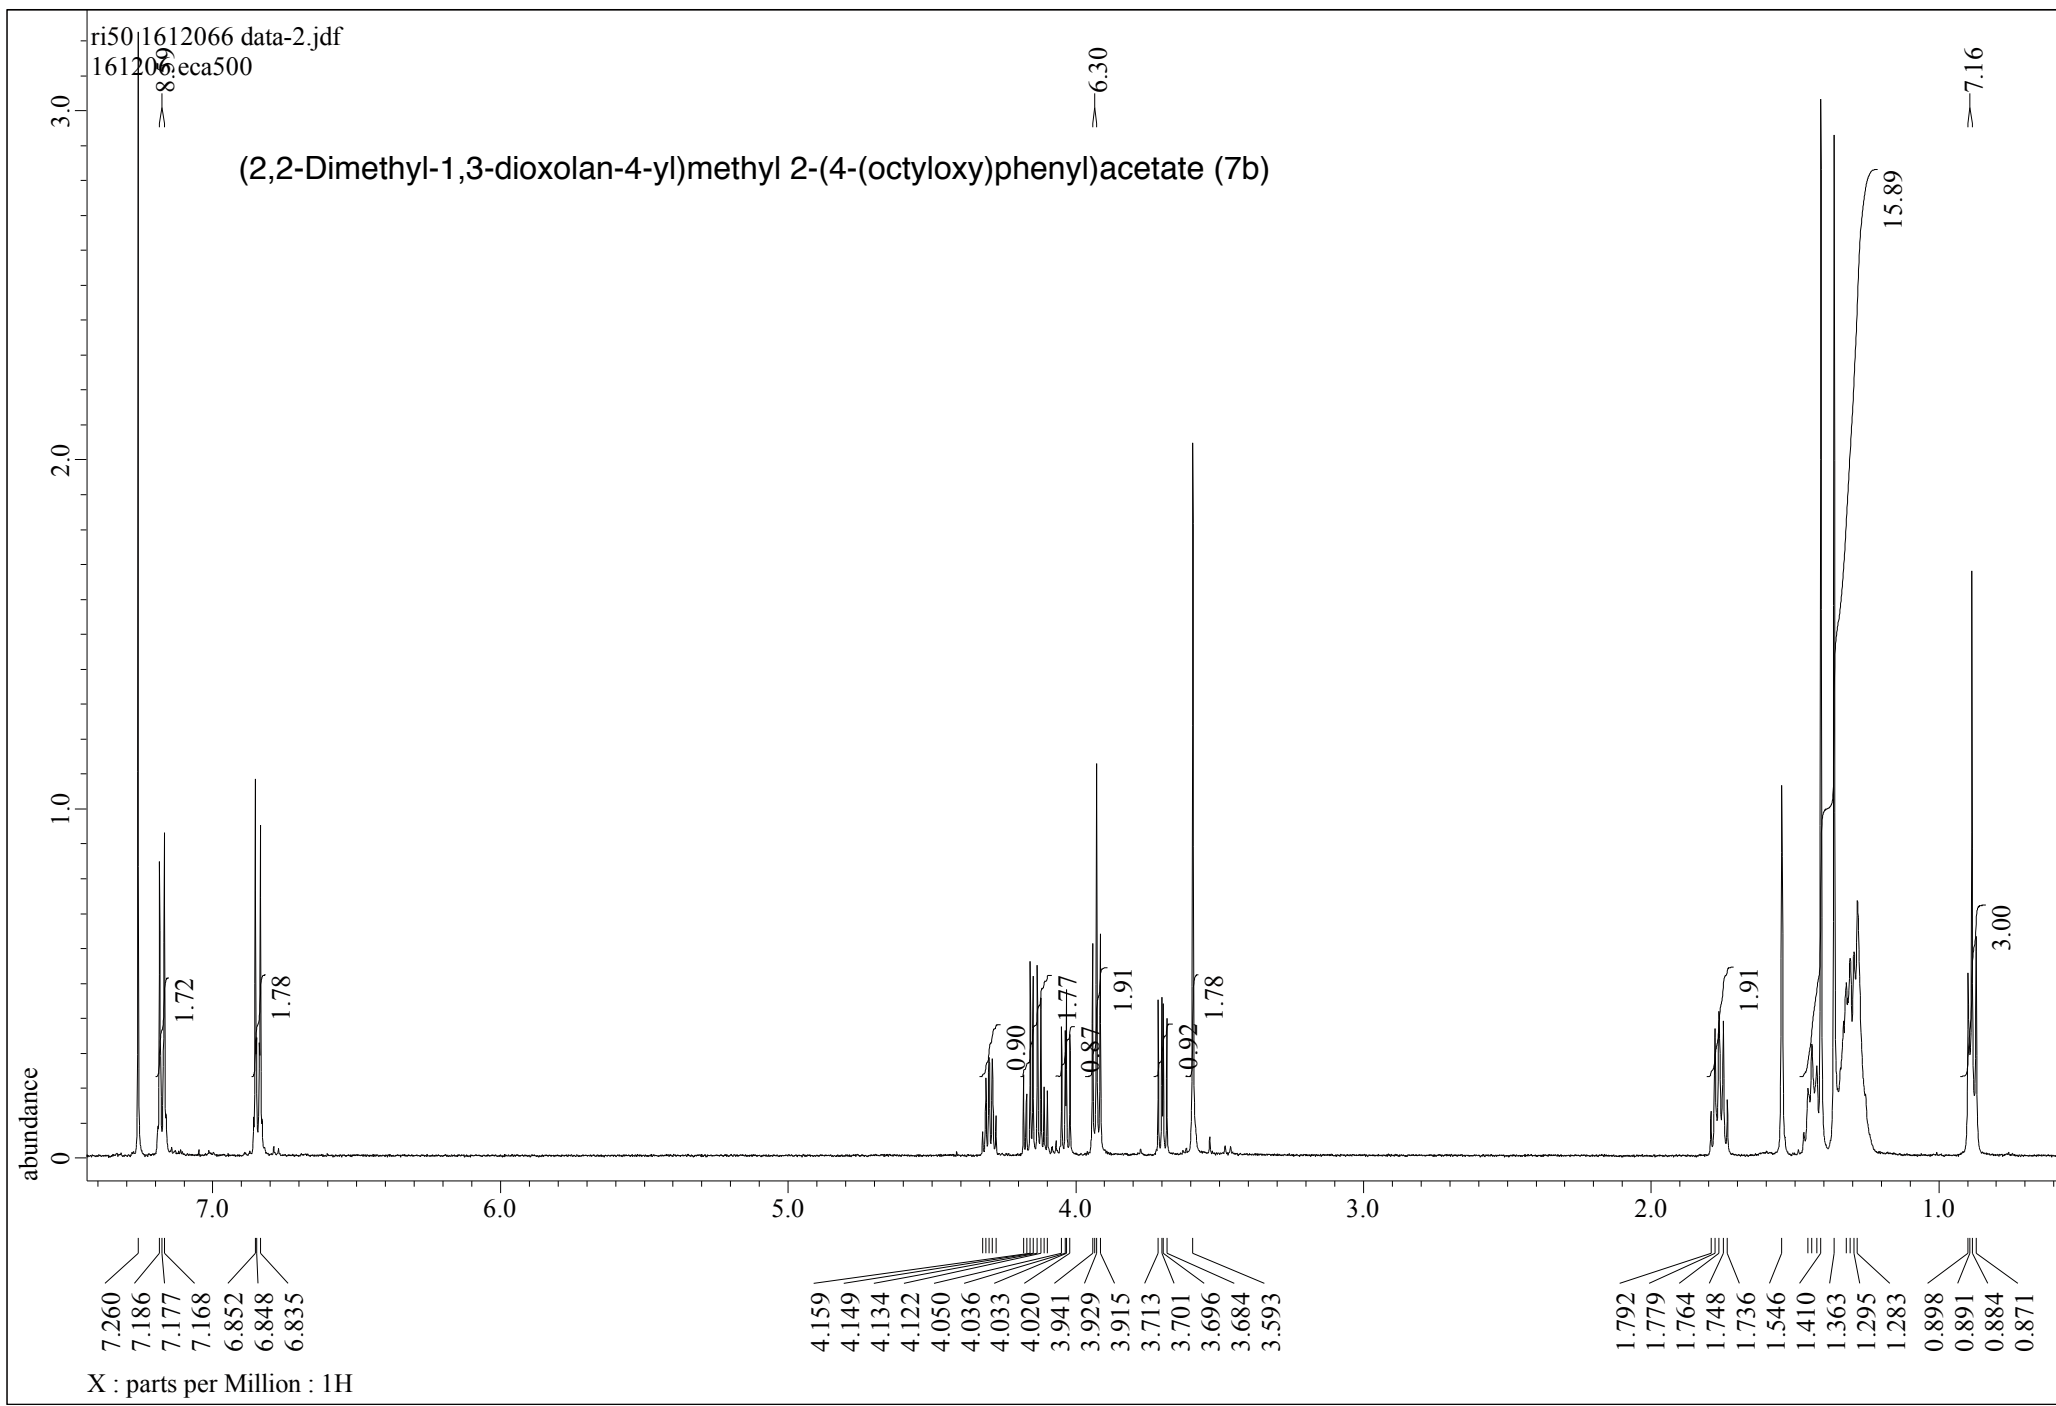

X : parts per Million : 1H

ri re20 MeOH data-1.jdf  
eca500

### 2,3-Dihydroxypropyl 2-phenylacetate (8a)

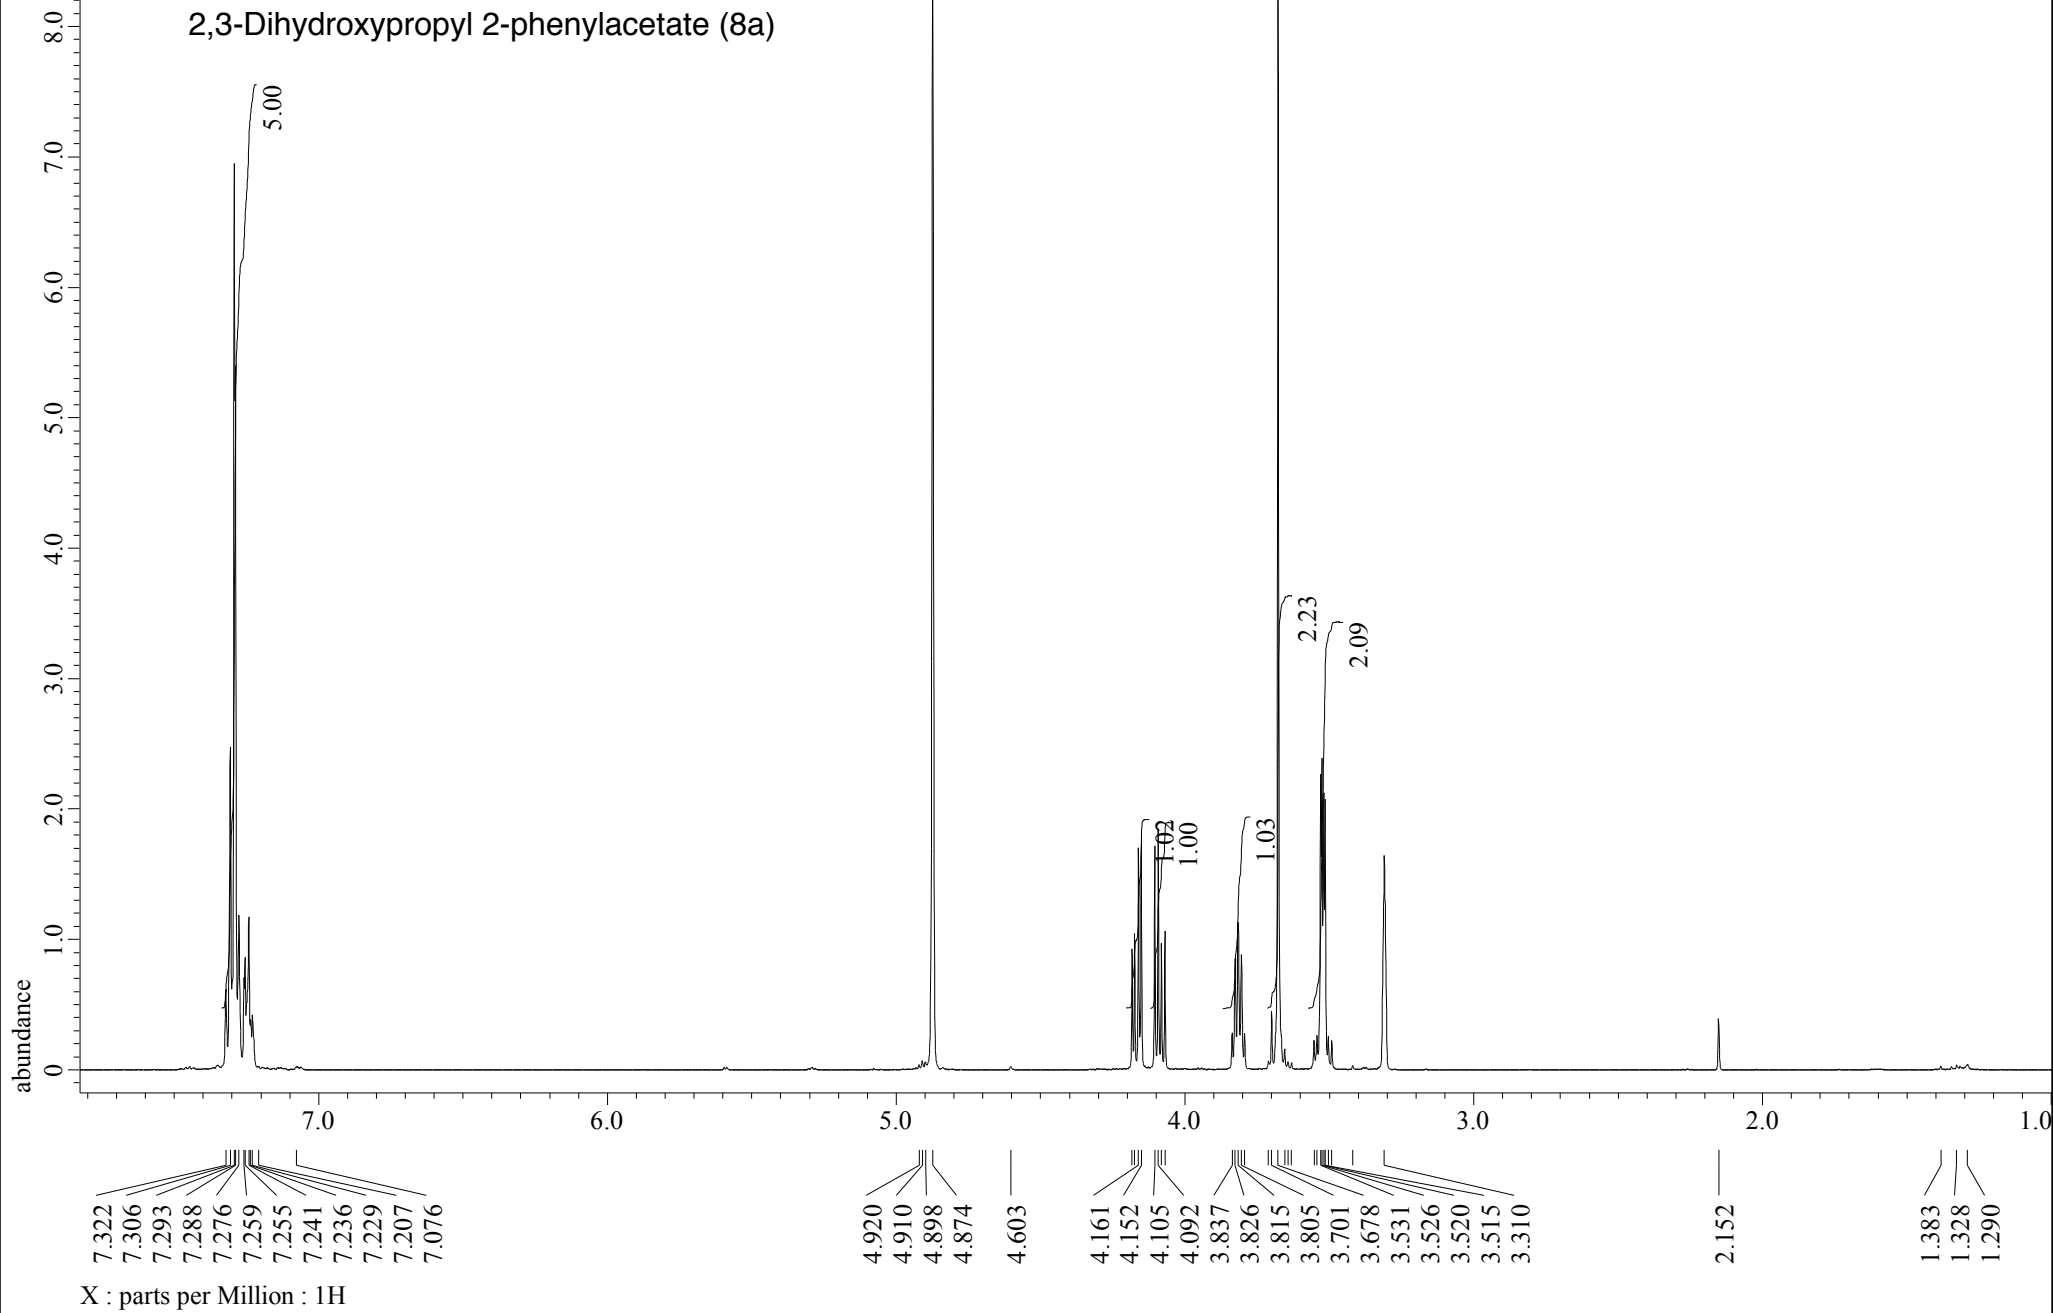

2,3-Dihydroxypropyl 2-phenylacetate (8a)

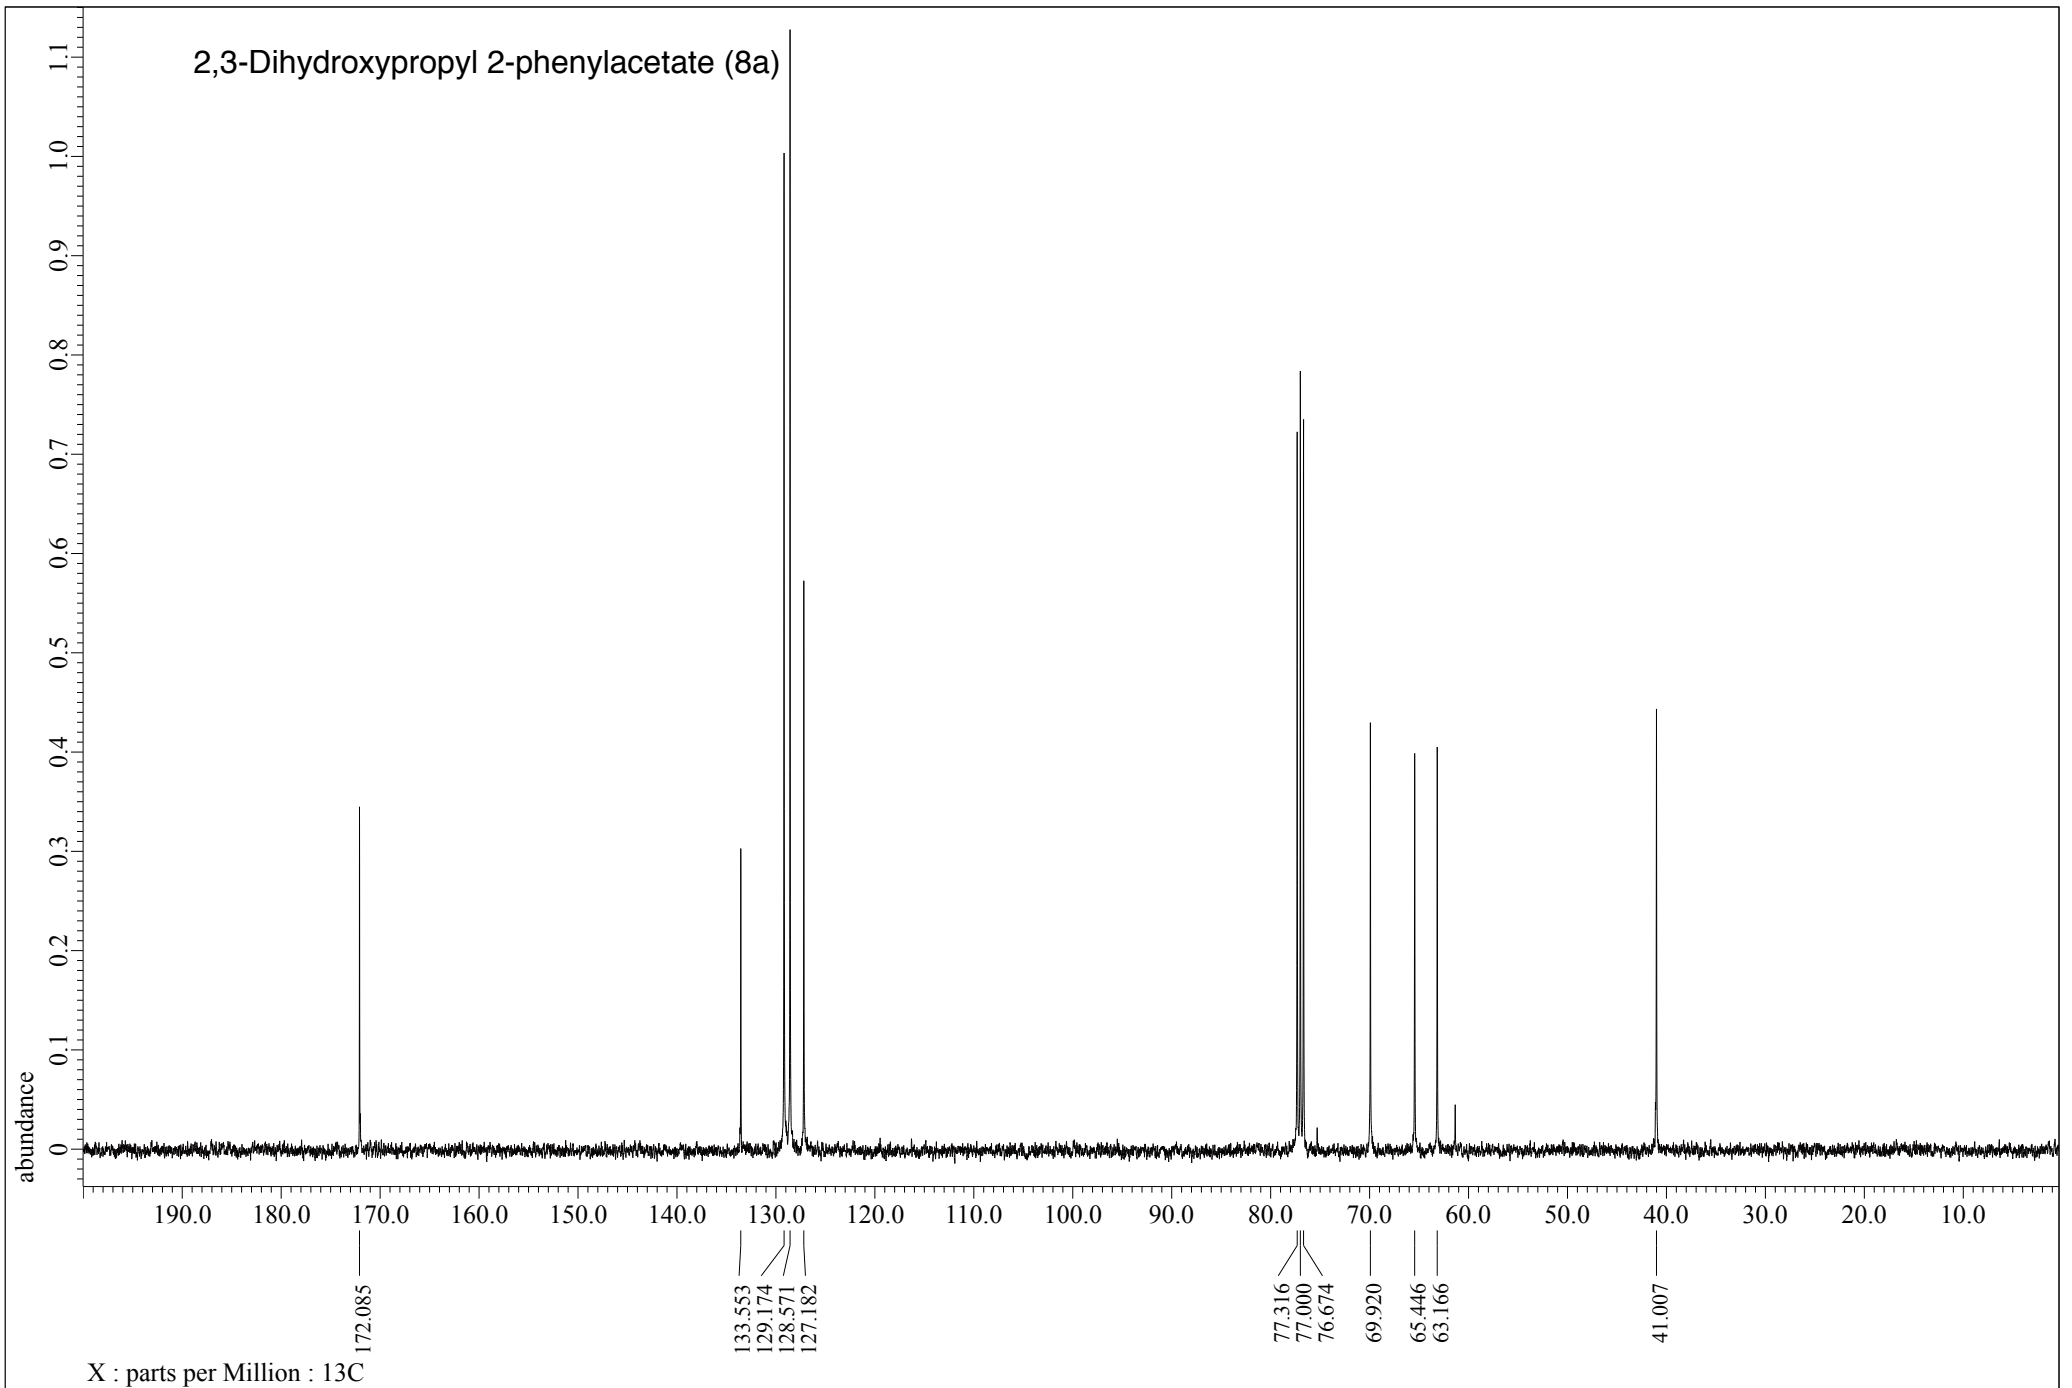

ri51 data-2.jdf  
ecs400 111115

2,3-Dihydroxypropyl 2-(4-(octyloxy)phenyl)acetate (8b)

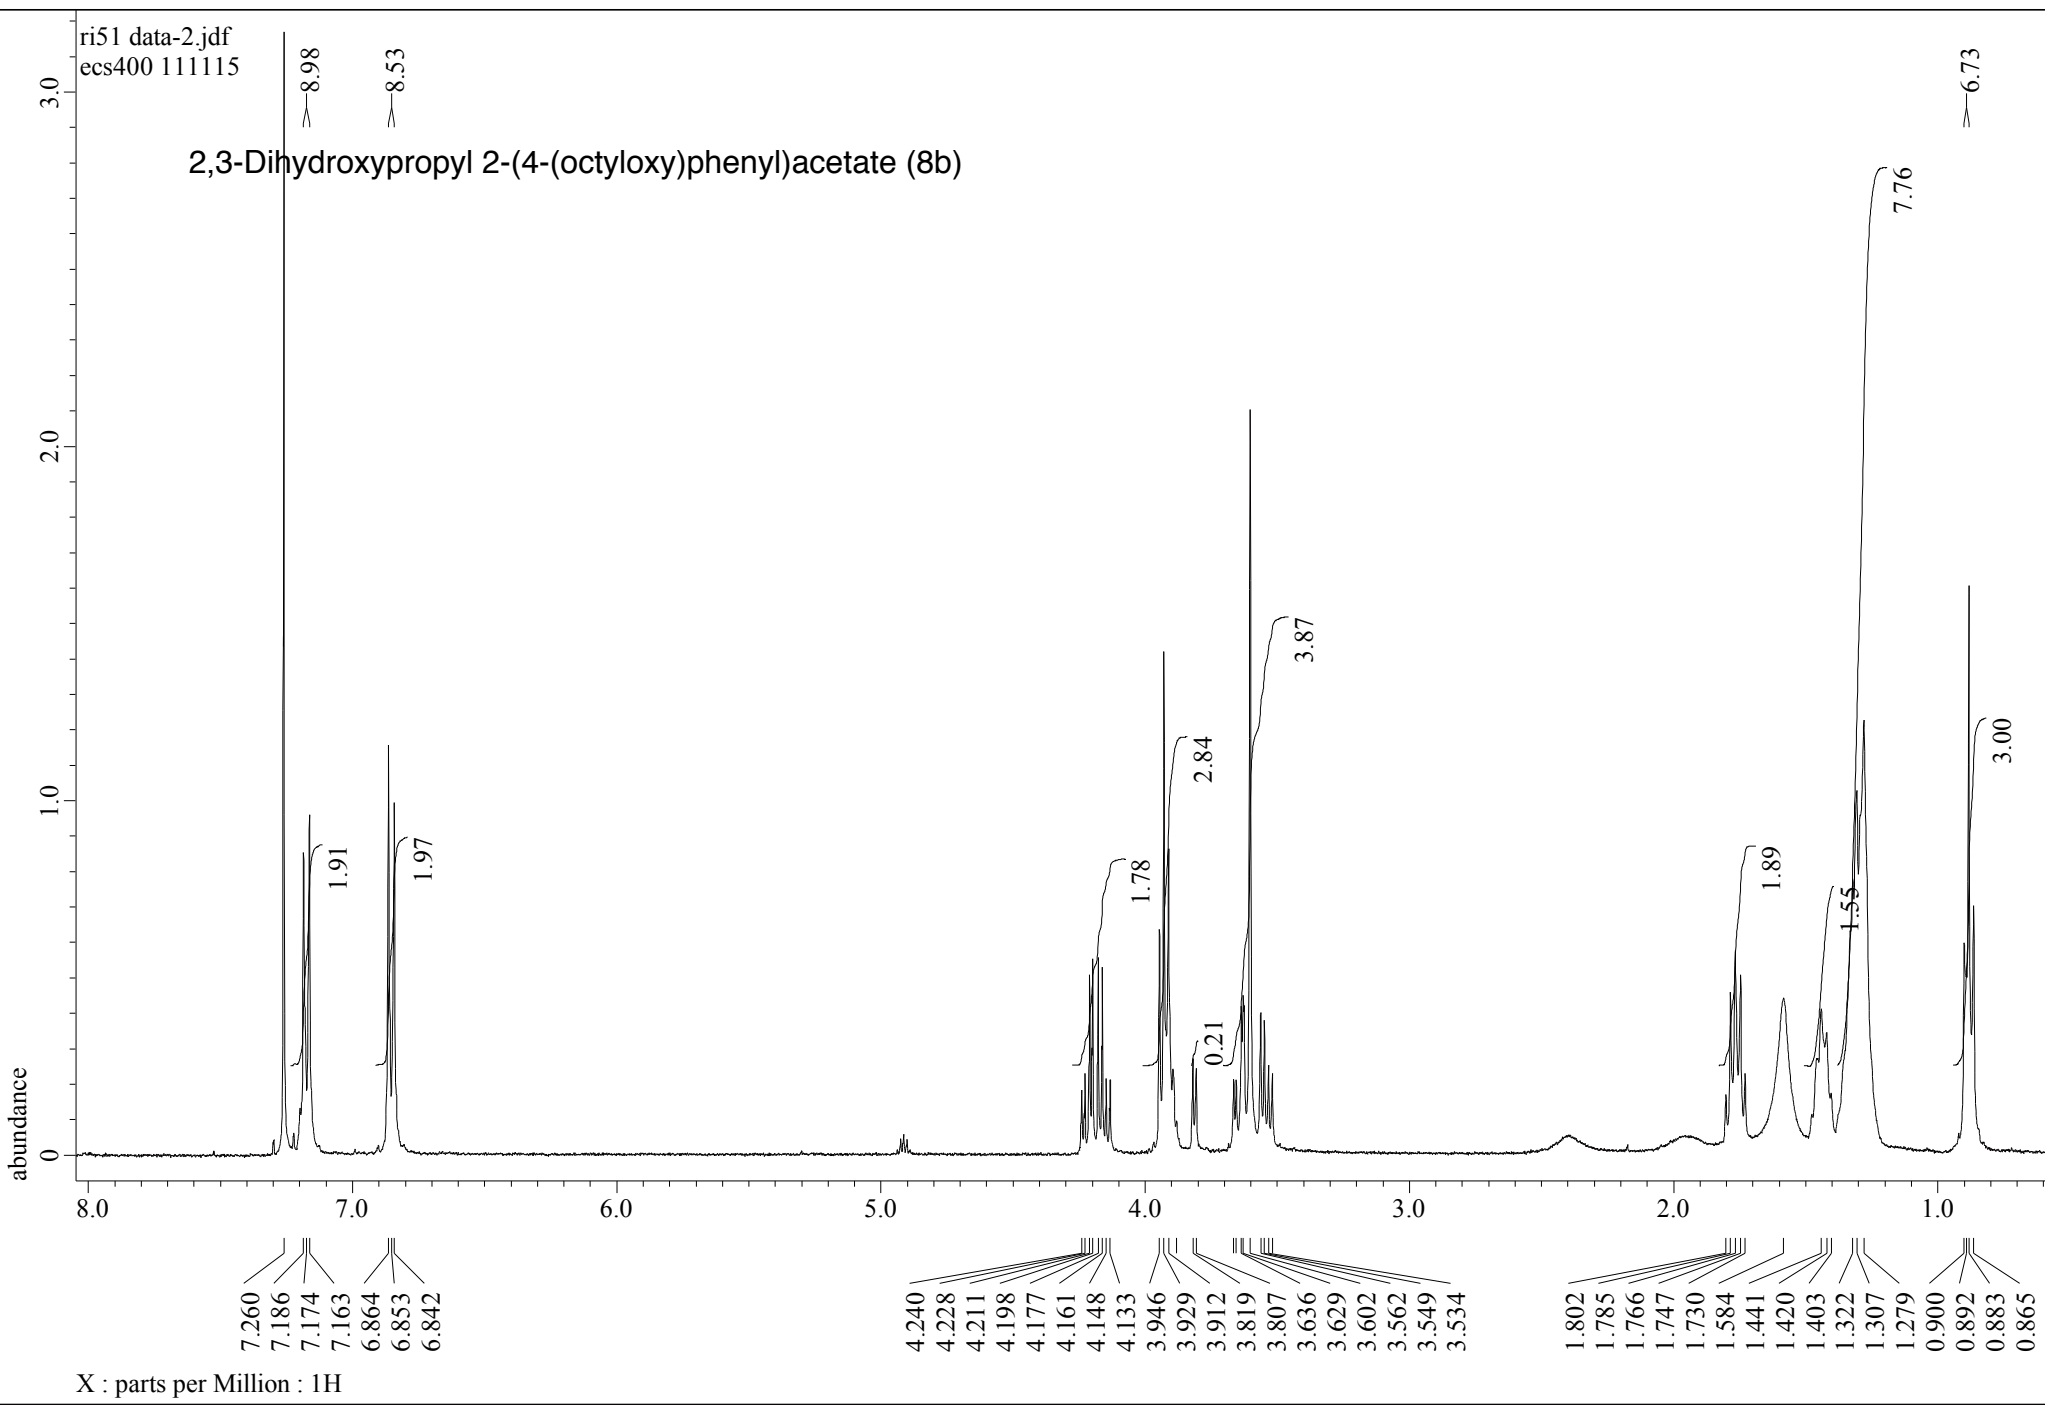

2,3-Dihydroxypropyl 2-(4-(octyloxy)phenyl)acetate (8b)

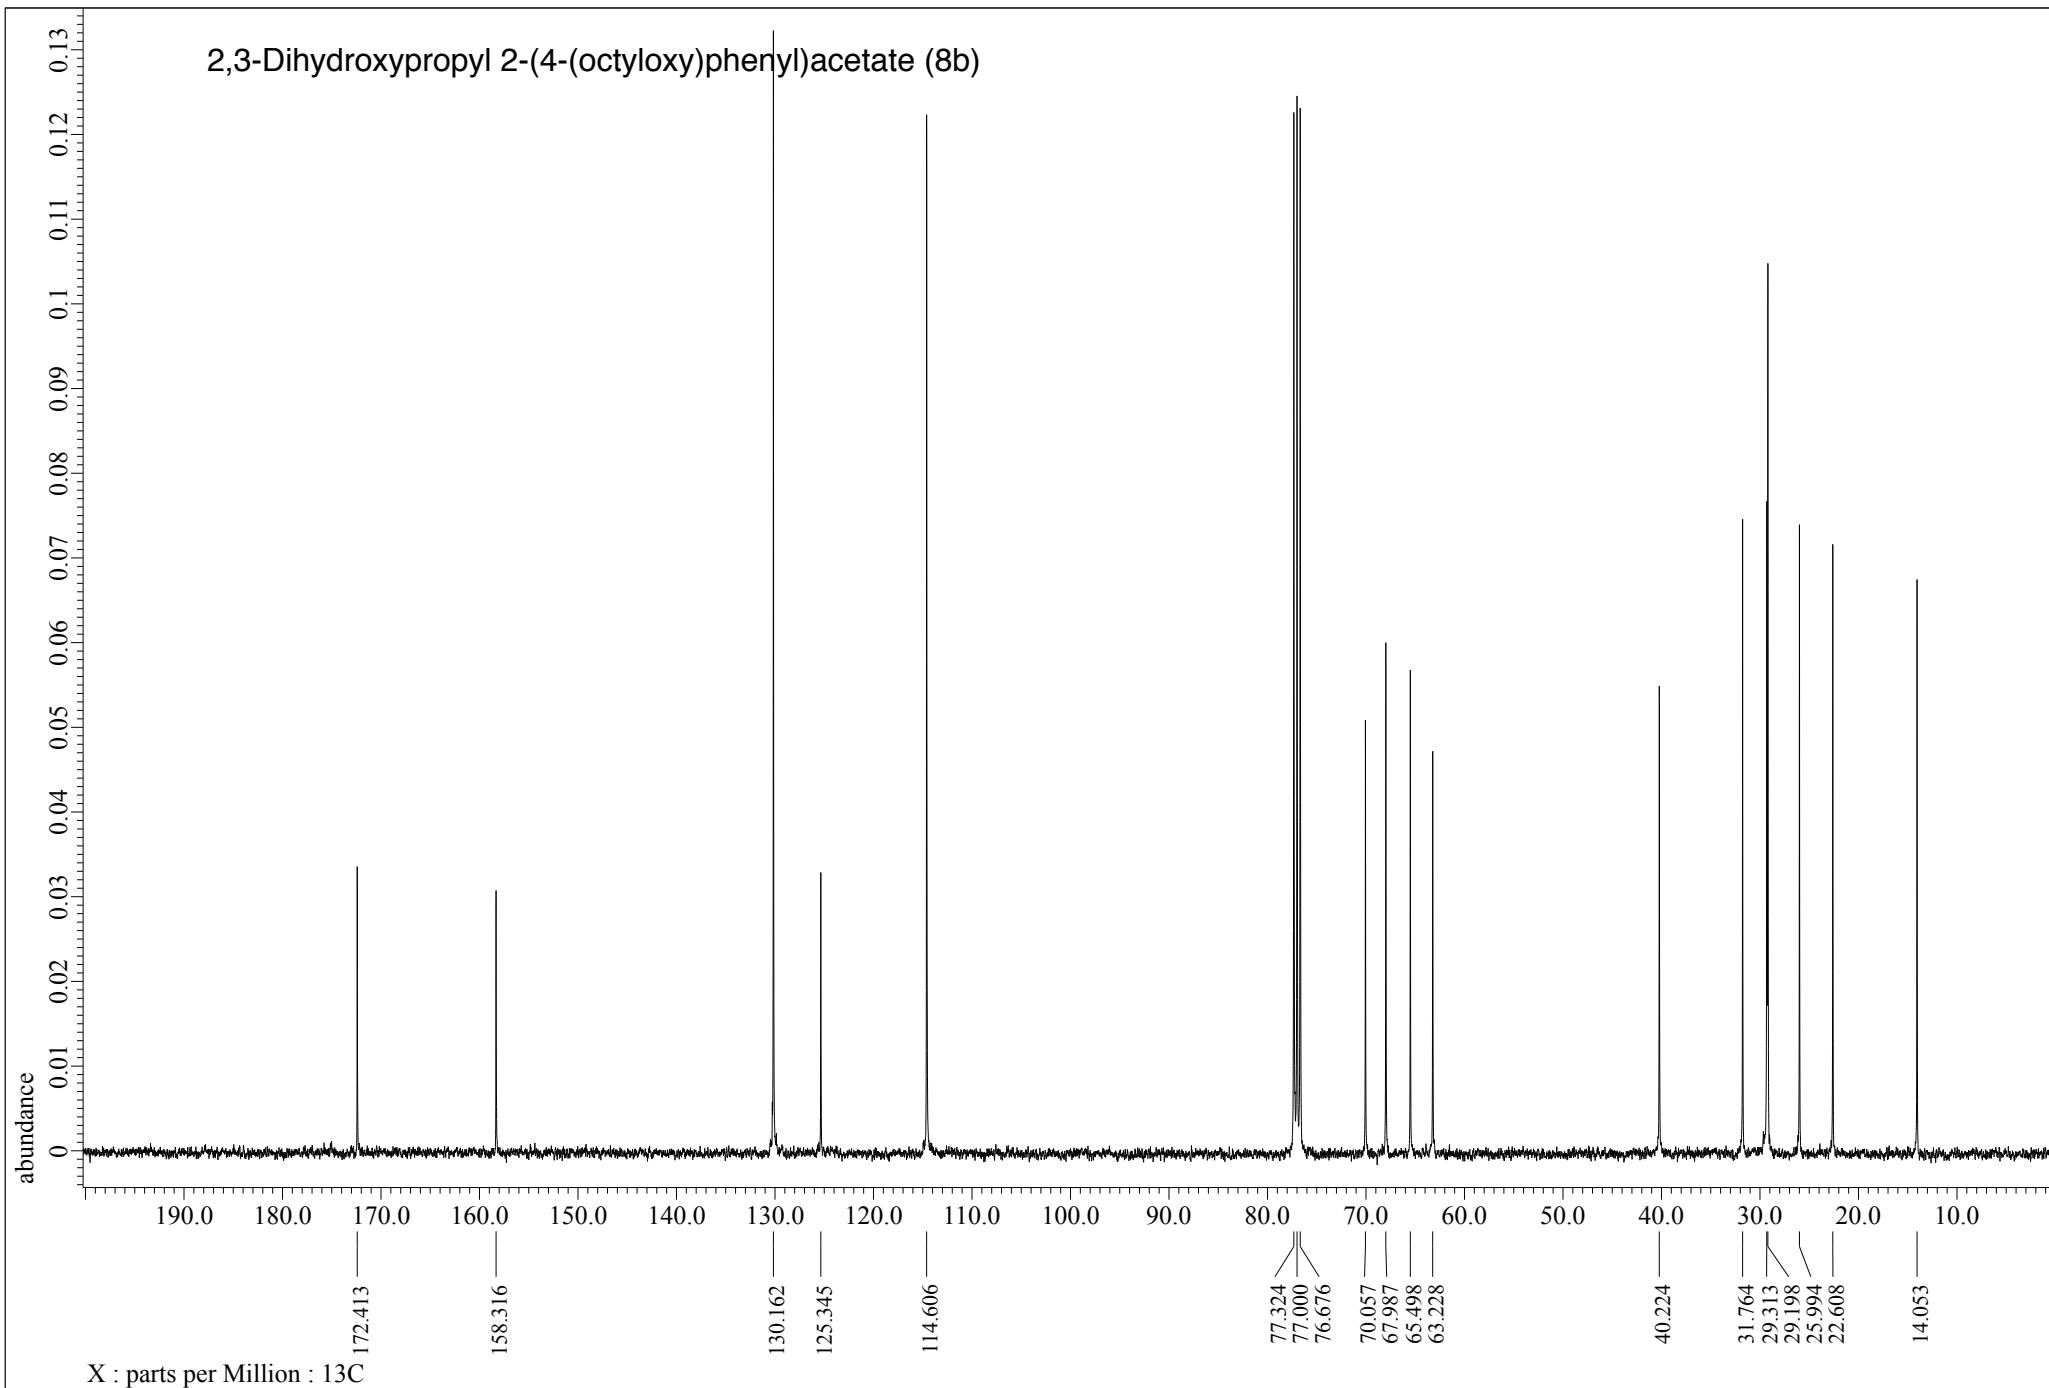

Supplement: c8cc07322h2.pdf [file c8cc07322h2.pdf]
